# Supplementary material for: Approximating outcome probabilities of linear optical circuits
Source: Springer Nature journal article supplement (doi:10.1038/s41534-023-00791-9), 2023-12-16
Supplement: MOESM1 [file 41534_2023_791_MOESM1_ESM.pdf]

# Supplementary Information for “Approximation of outcome probabilities of linear optical circuit”

Youngrong Lim<sup>1,\*</sup> and Changhun Oh<sup>2,\*</sup>

<sup>1</sup>*School of Computational Sciences, Korea Institute for Advanced Study, Seoul 02455, Korea*

<sup>2</sup>*Pritzker School of Molecular Engineering, University of Chicago, Chicago, Illinois 60637, USA*

## SUPPLEMENTARY TABLES

|                     | Additive-error                                                                                                                                                                            | Multiplicative-error                                                                                                                     |
|---------------------|-------------------------------------------------------------------------------------------------------------------------------------------------------------------------------------------|------------------------------------------------------------------------------------------------------------------------------------------|
| $ \text{Haf}(R) ^2$ | $\epsilon \prod_i^M \frac{\lambda_{\max}^2}{\sqrt{\lambda_{\max}^2(W(1/e)-1)^2 - \lambda_i^2 W(1/e)^2}} (*)$ (Th. 1)                                                                      | #P-hard [1]                                                                                                                              |
| $\text{Per}(B)$     | $\lambda_{\min} = 0 : \epsilon \prod_i^M \frac{4\lambda_{\max}^2}{e(2\lambda_{\max} - \lambda_i)} (*)$ (Th. 2)<br>$\lambda_{\min} > 0 : \epsilon \prod_i^M H_i^B(\lambda_i) (*)$ Eq. (63) | $\lambda_{\min} = 0 : \text{NP-hard}$ [2]<br>$\lambda_{\min} > 0 : \frac{\lambda_{\max}}{\lambda_{\min}} \leq 2$ [3] (*) Eq. (98)        |
| $\text{Haf}(A)$     | $\epsilon \prod_i^M H_i^A(n, r_i) (*)$ Eq. (35)                                                                                                                                           | $n \geq \frac{(6 \sinh(2r_{\max}) + \sqrt{18 \cosh(4r_{\max}) - 14 - 2})}{4} (*)$ (Th. 3)                                                |
| $\text{Tor}(R')$    | $\epsilon \prod_i^M T_i(\lambda_i) (*)$ Eq. (74)                                                                                                                                          | ?                                                                                                                                        |
| $\text{Tor}(B')$    | $\epsilon \prod_i^M T_i^B(\lambda_i) (*)$ Eq. (80)                                                                                                                                        | $\lambda_{\min} \geq \frac{1}{2}$ and $\lambda_{\max} \leq \frac{-\lambda_{\min}^2 + 3\lambda_{\min} - 1}{\lambda_{\min}} (*)$ Eq. (109) |
| $\text{Tor}(A')$    | $\epsilon \prod_i^M T_i^A(n, r_i) (*)$ Eq. (92)                                                                                                                                           | $n \geq \frac{1}{2} (e^{2r_{\max}} \sqrt{e^{8r_{\max}} + 3} + e^{6r_{\max}} - 1) (*)$ Eq. (111)                                          |

Supplementary Table I: Precision and conditions of efficient algorithms for estimating various matrix functions.

$R$ : complex symmetric matrices,  $B$ : HPSD matrices,  $R' = \begin{pmatrix} 0 & R^* \\ R & 0 \end{pmatrix}$ ,  $B' = \begin{pmatrix} B^T & 0 \\ 0 & B \end{pmatrix}$ ,  $A = \begin{pmatrix} R & B \\ B^T & R^* \end{pmatrix}$ ,  
 $A' = \begin{pmatrix} B^T & R^* \\ R & B \end{pmatrix}$ . (\*) indicates the results in the present work. A question mark represents unknown.

|                     | Upper bound                                                                    | Lower bound                                                                    |
|---------------------|--------------------------------------------------------------------------------|--------------------------------------------------------------------------------|
| $ \text{Haf}(R) ^2$ | ?                                                                              | ?                                                                              |
| $\text{Per}(B)$     | $\prod_i^M G_i(\lambda_i) (*)$ Eq. (116)                                       | $\prod_i^M \frac{\lambda_{\min}^2}{\lambda_i} [4] (*)$                         |
| $\text{Haf}(A)$     | $\prod_i^M G_i^H(r_i, n) (*)$ Eq. (127)                                        | $\prod_i^M L_i^H(r_i, n) (*)$ Eq. (121)                                        |
| $\text{Tor}(R')$    | ?                                                                              | ?                                                                              |
| $\text{Tor}(B')$    | $\prod_i^M \frac{\lambda_{\max}^2}{\lambda_i(1-\lambda_{\max})} (*)$ Eq. (137) | $\prod_i^M \frac{\lambda_{\min}^2}{\lambda_i(1-\lambda_{\min})} (*)$ Eq. (132) |
| $\text{Tor}(A')$    | $\prod_{i=1}^M G_i^T(r_i, n) (*)$ Eq. (147)                                    | $\prod_i^M L_i^T(r_i, n) (*)$ Eq. (142)                                        |

Supplementary Table II: Upper and lower bounds on various matrix functions.

\* sshalp@kias.re.kr

\* changhun@uchicago.edu



# SUPPLEMENTARY NOTE 1 (ESTIMATION OF MATRIX FUNCTIONS WITHIN ADDITIVE-ERRORS)

Here we give a detailed proof of Theorem 1 in the main text. We restate the theorem for the readability.

**Theorem 1.** (Estimating hafnian) For an  $M \times M$  complex symmetric matrix  $R$ , one can approximate  $|\text{Haf}(R)|^2$  with a success probability  $1 - \delta$  using the number of samples  $O(\log \delta^{-1}/\epsilon^2)$  within the additive-error

$$\epsilon \left( \frac{\lambda_{\max}}{\sqrt{1 - 2W(1/e)}} \right)^M \simeq \epsilon (1.502 \lambda_{\max})^M, \quad (1)$$

where  $\lambda_{\max}$  is the largest singular value of  $R$ .

*Proof.* Consider an input of  $M$ -mode product of pure squeezed vacuum states  $\{r_i\}_{i=1}^M$  and the all single-photon outcomes  $\mathbf{m} = (1, \dots, 1)$ . The outcome probability is given by

$$p_{\text{sq}} = \frac{1}{\mathcal{Z}} |\text{Haf}(R')|^2, \quad (2)$$

where  $\mathcal{Z} = \prod_{i=1}^M \cosh r_i$ ,  $R' = UDU^T$ , and  $D = \oplus_{i=1}^M \tanh r_i$ . Since any complex symmetric matrix can be decomposed by Takagi decomposition as  $UDU^T$  [5], the only restriction is the magnitude of singular values  $\lambda_i = \tanh r_i \in [0, 1)$ .

For a given complex symmetric matrix  $R$ , we can construct a quantum circuit, the probability of which is expressed as its hafnian. To do that, first rescale the matrix with the largest singular value  $\lambda_{\max}$  as  $R' = R/(a\lambda_{\max})$  with  $a > 1$ , and find the Takagi decomposition of  $R'$  as  $R' = UDU^T$  so that a GBS probability is matched to  $|\text{Haf}(R')|^2$ . From Eq. (2),

$$|\text{Haf}(R)|^2 = (a\lambda_{\max})^M |\text{Haf}(R')|^2 = (a\lambda_{\max})^M \mathcal{Z} p_{\text{sq}}. \quad (3)$$

If an estimator of  $|\text{Haf}(R)|^2$  lies in the interval  $[-C^M, C^M]$ , by Hoeffding inequality [6],

$$\Pr(|\text{Haf}(R)|^2 - (a\lambda_{\max})^M \mathcal{Z} \mu| \geq (a\lambda_{\max})^M \mathcal{Z} \epsilon) \leq 2 \exp \left( -\frac{N\epsilon^2}{2C^{2M}} \right), \quad (4)$$

where  $\mu$  is the sample mean of  $p_{\text{sq}}$ . With a success probability  $1 - \delta$ , a sufficient number of samples for the estimation of  $|\text{Haf}(R)|^2$  within an additive-error  $\epsilon$  is given by

$$N = \frac{2(a\lambda_{\max})^{2M} \mathcal{Z}^2 C^{2M}}{\epsilon^2} \ln \frac{2}{\delta}. \quad (5)$$

In other words, if we fix the sample size as  $N = O(\log \delta^{-1}/\epsilon^2)$ , one can estimate  $|\text{Haf}(R)|^2$  with a success probability  $1 - \delta$  within an additive-error  $2\epsilon(a\lambda_{\max} C \mathcal{Z}^{1/M})^M$ . To obtain the bound  $C$ , we express the probability using  $s$ -PQDs as

$$p_{\text{sq}} = \int d^{2M} \alpha \prod_{i=1}^M \frac{1}{\pi \sqrt{\det(V_{\text{sq},i} - s/2)}} e^{-\alpha_i (V_{\text{sq},i} - s/2)^{-1} \alpha_i^T} \prod_{j=1}^M \frac{8|\beta_j|^2 + 2(s^2 - 1)}{(s+1)^3} e^{-\frac{2|\beta_j|^2}{s+1}} \quad (6)$$

$$= \int d^{2M} \alpha \prod_{i=1}^M \frac{2}{\pi \sqrt{(e^{2r_i} - s)(e^{-2r_i} - s)}} e^{-\frac{2\alpha_{ix}^2}{e^{2r_i} - s} - \frac{2\alpha_{iy}^2}{e^{-2r_i} - s}} \prod_{j=1}^M \frac{8|\beta_j|^2 + 2(s^2 - 1)}{(s+1)^3} e^{-\frac{2|\beta_j|^2}{s+1}} \quad (7)$$

$$= \int d^{2M} \alpha \prod_{i=1}^M \frac{2}{\pi \sqrt{(e^{2r_i} - s)(e^{-2r_i} - s)}} e^{-\left(\frac{2}{e^{2r_i} - s} - \gamma \frac{2}{e^{2r_{\max} - s}}\right) \alpha_{ix}^2 - \left(\frac{2}{e^{-2r_i} - s} - \gamma \frac{2}{e^{2r_{\max} - s}}\right) \alpha_{iy}^2} \\ \times \prod_{j=1}^M \frac{8|\beta_j|^2 + 2(s^2 - 1)}{(s+1)^3} e^{-\left(\frac{2}{s+1} + \gamma \frac{2}{e^{2r_{\max} - s}}\right) |\beta_j|^2} \quad (8)$$

$$= \int d^{2M} \alpha \prod_{i=1}^M \frac{2}{\pi} \sqrt{\frac{e^{2r_{\max} - s} - \gamma(e^{2r_i} - s)}{(e^{2r_i} - s)(e^{2r_{\max} - s})}} \sqrt{\frac{e^{2r_{\max} - s} - \gamma(e^{-2r_i} - s)}{(e^{-2r_i} - s)(e^{2r_{\max} - s})}} e^{-\left(\frac{2}{e^{2r_i} - s} - \gamma \frac{2}{e^{2r_{\max} - s}}\right) \alpha_{ix}^2 - \left(\frac{2}{e^{-2r_i} - s} - \gamma \frac{2}{e^{2r_{\max} - s}}\right) \alpha_{iy}^2} \\ \times \prod_{j=1}^M \sqrt{\frac{e^{2r_{\max} - s}}{e^{2r_{\max} - s} - \gamma(e^{2r_j} - s)}} \sqrt{\frac{e^{2r_{\max} - s}}{e^{2r_{\max} - s} - \gamma(e^{-2r_j} - s)}} \frac{8|\beta_j|^2 + 2(s^2 - 1)}{(s+1)^3} e^{-\left(\frac{2}{s+1} + \gamma \frac{2}{e^{2r_{\max} - s}}\right) |\beta_j|^2} \quad (9)$$

$$:= \int d^{2M} \alpha \prod_{i=1}^M P_{\text{sq},i}(\alpha_i, r_i, \gamma, s) \prod_{j=1}^M f_{\text{sq},j}(\beta_j, r_j, \gamma, s), \quad (10)$$



where  $V_{\text{sq},i}$  is the covariance matrix of a squeezed vacuum state in mode  $i$  and  $\gamma \in [0, 1)$  is the (normalized) parameter shifting the Gaussian factor such that  $\gamma \rightarrow 1$  ( $\gamma = 0$ ) means maximum (no) shifting. To obtain a bound on  $|f_{\text{sq},j}(\beta_j, r_j, \gamma, s)|$ , let us set  $s = s_{\text{max}} = e^{-2r_{\text{max}}}$  and  $r_j = \tanh^{-1} \lambda_j$ . The extreme points of  $f_{\text{sq},j}$  are  $0, \pm\beta^*$  with

$$\beta^* = \sqrt{\frac{\lambda_{\text{max}}(\gamma(\lambda_{\text{max}} - 1) - 4\lambda_{\text{max}} - 2)}{(\lambda_{\text{max}} + 1)^2(\gamma(\lambda_{\text{max}} - 1) - 2\lambda_{\text{max}})}}. \quad (11)$$

Note that for  $s_{\text{max}} < 1$ ,  $f_{\text{sq},j}(0, \lambda_j, \gamma, s_{\text{max}}) < 0$  and  $f_{\text{sq},j}(\beta^*, \lambda_j, \gamma, s_{\text{max}}) > 0$ . Since the extreme values are changing monotonically as  $\gamma$ , we choose  $\gamma$  satisfying the condition  $-f_{\text{sq},j}(0, \lambda_j, \gamma, s_{\text{max}}) = f_{\text{sq},j}(\beta^*, \lambda_j, \gamma, s_{\text{max}})$ , which is given by

$$\gamma^* = \frac{2(1 + \lambda_{\text{max}})W(1/e) - 2\lambda_{\text{max}}}{1 - \lambda_{\text{max}}} \quad \text{for } 0 \leq \lambda_{\text{max}} < \frac{W(1/e)}{1 - W(1/e)}, \quad (12)$$

where  $W(x)$  is the Lambert  $W$  function, and  $\frac{W(1/e)}{1 - W(1/e)} \simeq 0.386$ . Then an upper bound is obtained by substituting  $\gamma^*$  into  $f_{\text{sq},j}(\beta^*, \lambda_j, \gamma, s_{\text{max}})$ , such that

$$\min_{s, \gamma} \max_{\beta_j} |f_{\text{sq},j}(\beta_j, \lambda_j, \gamma, s)| \leq \frac{\lambda_{\text{max}}^2 \sqrt{1 - \lambda_j^2}}{\sqrt{\lambda_{\text{max}}^2 (1 - W(1/e))^2 - \lambda_j^2 W(1/e)^2}} \quad \text{for } 0 \leq \lambda_{\text{max}} < \frac{W(1/e)}{1 - W(1/e)}, \quad (13)$$

Although this bound is valid only for a certain range of  $\lambda_{\text{max}}$ , we can also find the same bound out of the range by shifting the Gaussian factor in the reverse direction. Specifically,

$$p_{\text{sq}} = \int d^{2M} \alpha \prod_{i=1}^M \frac{2}{\pi \sqrt{(e^{2r_i} - s)(e^{-2r_i} - s)}} e^{-\frac{2\alpha_{ix}^2}{e^{2r_i} - s} - \frac{2\alpha_{iy}^2}{e^{-2r_i} - s}} \prod_{j=1}^M \frac{8|\beta_j|^2 + 2(s^2 - 1)}{(s + 1)^3} e^{-\frac{2|\beta_j|^2}{s+1}} \quad (14)$$

$$= \int d^{2M} \alpha \prod_{i=1}^M \frac{2}{\pi \sqrt{(e^{2r_i} - s)(e^{-2r_i} - s)}} e^{-\left(\frac{2}{e^{2r_i} - s} + \gamma' \frac{2}{s+1}\right) \alpha_{ix}^2} e^{-\left(\frac{2}{e^{-2r_i} - s} + \gamma' \frac{2}{s+1}\right) \alpha_{iy}^2} \prod_{j=1}^M \frac{8|\beta_j|^2 + 2(s^2 - 1)}{(s + 1)^3} e^{-(1-\gamma') \frac{2|\beta_j|^2}{s+1}} \quad (15)$$

$$= \int d^{2M} \alpha \prod_{i=1}^M \frac{2}{\pi} \sqrt{\frac{s+1 + \gamma'(e^{2r_i} - s)}{(e^{2r_i} - s)(s+1)}} \sqrt{\frac{s+1 + \gamma'(e^{-2r_i} - s)}{(e^{-2r_i} - s)(s+1)}} e^{-\left(\frac{2}{e^{2r_i} - s} + \gamma' \frac{2}{s+1}\right) \alpha_{ix}^2} e^{-\left(\frac{2}{e^{-2r_i} - s} + \gamma' \frac{2}{s+1}\right) \alpha_{iy}^2} \times \prod_{j=1}^M \sqrt{\frac{s+1}{s+1 + \gamma'(e^{2r_j} - s)}} \sqrt{\frac{s+1}{s+1 + \gamma'(e^{-2r_j} - s)}} \frac{8|\beta_j|^2 + 2(s^2 - 1)}{(s + 1)^3} e^{-(1-\gamma') \frac{2|\beta_j|^2}{s+1}} \quad (16)$$

$$:= \int d^{2M} \alpha \prod_{i=1}^M P'_{\text{sq},i}(\alpha_i, r_i, \gamma', s) \prod_{j=1}^M f'_{\text{sq},j}(\beta_j, r_j, \gamma', s), \quad (17)$$

where  $\gamma' \in [0, 1)$  is the parameter shifting the exponential term in the reverse direction such that  $\gamma' \rightarrow 1$  ( $\gamma' = 0$ ) means maximum (no) shifting. Similarly, the extreme points are  $0, \pm\beta'^*$  with

$$\beta'^* = \sqrt{\frac{(\gamma' - 2)\lambda_{\text{max}} - 1}{(\gamma' - 1)(\lambda_{\text{max}} + 1)^2}}. \quad (18)$$

Then the  $\gamma'$  satisfying the condition  $-f'_{\text{sq},j}(0, \lambda_j, \gamma', s_{\text{max}}) = f'_{\text{sq},j}(\beta'^*, \lambda_j, \gamma', s_{\text{max}})$  is given by

$$\gamma'^* = \frac{\lambda_{\text{max}} - (1 + \lambda_{\text{max}})W(1/e)}{\lambda_{\text{max}}} \quad \text{for } \frac{W(1/e)}{1 - W(1/e)} \leq \lambda_{\text{max}} < 1. \quad (19)$$

Finally we obtain an upper bound such that

$$\min_{s, \gamma'} \max_{\beta_j} |f'_j(\beta_j, \lambda_j, \gamma', s)| \leq \frac{\lambda_{\text{max}}^2 \sqrt{1 - \lambda_j^2}}{\sqrt{\lambda_{\text{max}}^2 (1 - W(1/e))^2 - \lambda_j^2 W(1/e)^2}} \quad \text{for } \frac{W(1/e)}{1 - W(1/e)} \leq \lambda_{\text{max}} < 1, \quad (20)$$



which covers the remaining range of  $\lambda_{\max}$ .

Note that

$$\mathcal{Z} = \prod_{i=1}^M \cosh r_i = \frac{1}{\prod_{i=1}^M \sqrt{1 - \lambda_i^2}}. \quad (21)$$

Consequently, by Eq. (4), for a given complex  $M \times M$  matrix  $R$ , and for the number of samples  $N = O(\log \delta^{-1}/\epsilon^2)$ , we can estimate  $|\text{Haf}(R)|^2$  with a success probability  $1 - \delta$  within an additive-error as

$$\epsilon \prod_{i=1}^M \frac{a \lambda_{\max} \lambda'_{\max}}{\sqrt{\lambda_{\max}^2 (W(1/e) - 1)^2 - \lambda_i'^2 W(1/e)^2}} = \epsilon \prod_{i=1}^M \frac{\lambda_{\max}^2}{\sqrt{\lambda_{\max}^2 (W(1/e) - 1)^2 - \lambda_i^2 W(1/e)^2}}, \quad (22)$$

where  $\lambda'_i = \frac{\lambda_i}{a \lambda_{\max}}$ . We find upper and lower bound by setting  $\lambda_i = \lambda_{\max}$  and  $\lambda_i = 0$ , respectively, such as

$$\epsilon (1.386 \lambda_{\max})^M \simeq \left( \epsilon \frac{\lambda_{\max}}{1 - W(1/e)} \right)^M \leq \epsilon \prod_{i=1}^M \frac{\lambda_{\max}^2}{\sqrt{\lambda_{\max}^2 (W(1/e) - 1)^2 - \lambda_i^2 W(1/e)^2}} \leq \epsilon \left( \frac{\lambda_{\max}}{\sqrt{1 - 2W(1/e)}} \right)^M \simeq \epsilon (1.502 \lambda_{\max})^M. \quad (23)$$

□

Next, we consider a squeezed thermal input state  $\{r_i, n\}_{i=1}^M$  to allow  $s_{\max} \geq 1$ . For simplicity, the average thermal photon number  $n$  is fixed. Then the probability of all single-photon outcomes is written by hafnian as

$$p_{\text{st}} = \frac{1}{\sqrt{|V_Q^{\text{st}}|}} \text{Haf}(A), \quad (24)$$

where  $V_Q^{\text{st}} = V_{\text{st}} + \mathbb{I}_{2M}/2$  with  $V_{\text{st}}$  the covariance matrix of a squeezed thermal state and  $A = \begin{pmatrix} R & B \\ B^T & R^* \end{pmatrix}$  with a symmetric matrix  $R$  and an HPSD matrix  $B$  decomposed by a unitary matrix  $U$  as  $UDU^T$  and  $UD'U^\dagger$ , respectively, with

$$D = \bigoplus_{i=1}^M \frac{(1 + 2n) \sinh 2r_i}{1 + 2n(1 + n) + (1 + 2n) \cosh 2r_i}, \quad (25)$$

$$D' = \bigoplus_{i=1}^M \frac{2n(1 + n)}{1 + 2n(1 + n) + (1 + 2n) \cosh 2r_i}. \quad (26)$$

Let us define  $a_{\pm}(r_i, n) = (2n + 1)e^{\pm 2r_i}$ ,  $a_{\min} = (2n + 1)e^{-2r_{\max}}$ , and  $a_{\max} = (2n + 1)e^{2r_{\max}}$ . Then the probability  $p_{\text{st}}$  is written by  $s$ -PQDs as

$$p_{\text{st}} = \int d^{2M} \alpha \prod_{i=1}^M \frac{2}{\pi \sqrt{(a_+(r_i, n) - s)(a_-(r_i, n) - s)}} e^{-\frac{2\alpha_{ix}^2}{a_+(r_i, n) - s} - \frac{2\alpha_{iy}^2}{a_-(r_i, n) - s}} \prod_{j=1}^M \frac{8|\beta_j|^2 + 2(s^2 - 1)}{(s + 1)^3} e^{-\frac{2|\beta_j|^2}{s + 1}} \quad (27)$$

$$\begin{aligned} &= \int d^{2M} \alpha \prod_{i=1}^M \frac{2}{\pi \sqrt{(a_+(r_i, n) - s)(a_-(r_i, n) - s)}} e^{-\left(\frac{2}{a_+(r_i, n) - s} + \gamma' \frac{2}{s + 1}\right) \alpha_{ix}^2} e^{-\left(\frac{2}{a_-(r_i, n) - s} + \gamma' \frac{2}{s + 1}\right) \alpha_{iy}^2} \\ &\times \prod_{j=1}^M \frac{8|\beta_j|^2 + 2(s^2 - 1)}{(s + 1)^3} e^{-(1 - \gamma') \frac{2|\beta_j|^2}{s + 1}} \end{aligned} \quad (28)$$

$$\begin{aligned} &= \int d^{2M} \alpha \prod_{i=1}^M \frac{2}{\pi} \sqrt{\frac{s + 1 + \gamma'(a_+(r_i, n) - s)}{(a_+(r_i, n) - s)(s + 1)}} \sqrt{\frac{s + 1 + \gamma'(a_-(r_i, n) - s)}{(a_-(r_i, n) - s)(s + 1)}} e^{-\left(\frac{2}{a_+(r_i, n) - s} + \gamma' \frac{2}{s + 1}\right) \alpha_{ix}^2} e^{-\left(\frac{2}{a_-(r_i, n) - s} + \gamma' \frac{2}{s + 1}\right) \alpha_{iy}^2} \\ &\times \prod_{j=1}^M \sqrt{\frac{s + 1}{s + 1 + \gamma'(a_+(r_j, n) - s)}} \sqrt{\frac{s + 1}{s + 1 + \gamma'(a_-(r_j, n) - s)}} \frac{8|\beta_j|^2 + 2(s^2 - 1)}{(s + 1)^3} e^{-(1 - \gamma') \frac{2|\beta_j|^2}{s + 1}} \end{aligned} \quad (29)$$

$$:= \int d^{2M} \alpha \prod_{i=1}^M P'_{\text{st}, i}(\alpha_i, r_i, n, \gamma', s) \prod_{j=1}^M f'_{\text{st}, j}(\beta_j, r_j, n, \gamma', s), \quad (30)$$



where we use the reverse shifting of the Gaussian factor. To obtain an upper bound on  $|f'_{\text{st},j}(\beta_j, r_j, n, \gamma', s)|$ , let us set  $s = s_{\max} = a_{\min}$ . The extreme points are  $0, \pm\beta'^*$  with

$$\beta'^* = \frac{1}{2} \sqrt{\frac{e^{-4r_{\max}} (2n + e^{2r_{\max}} + 1) \{(\gamma' - 3)e^{2r_{\max}} - (\gamma' - 1)(2n + 1)\}}{\gamma' - 1}}. \quad (31)$$

After choosing  $\gamma'^* = e^{-\tanh r_{\max} \frac{n}{n+1}}$ ,

$$\begin{aligned} \min_{s, \gamma'} \max_{\beta_j} |f'_{\text{st},j}(\beta_j, r_j, n, \gamma', s)| &\leq |f'_{\text{st},j}(\beta'^*, r_j, n, \gamma'^*, a_{\min})| \\ &= \exp \left[ \frac{1}{2} \left\{ -3 + \frac{ne^{-\tanh r_{\max}}}{1+n} - (2n+1)e^{-2r_{\max}} \left( -1 + \frac{ne^{-\tanh r_{\max}}}{1+n} \right) + 2r_j + 8r_{\max} + 3 \tanh r_{\max} \right\} \right] \\ &\times \frac{4(1+n)^2}{(1+e^{2r_{\max}}+2n)\{(1+n)e^{\tanh r_{\max}}-n\}} \sqrt{\frac{1}{1+e^{2r_{\max}}+3n+ne^{2r_{\max}}+2n^2+n(2n+1)(e^{2(r_j+r_{\max})}-1)e^{-\tanh r_{\max}}}} \\ &\times \sqrt{\frac{1}{(2n+1)e^{2r_j}\{-n+(n+1)e^{\tanh r_{\max}}\}+e^{2r_{\max}}\{n+2n^2+(n+1)e^{2r_j+\tanh r_{\max}}\}}}. \end{aligned} \quad (32)$$

Meanwhile,

$$\sqrt{|V_Q^{\text{st}}|} = \prod_{i=1}^M \sqrt{\frac{1}{2} + n(n+1) + (n + \frac{1}{2}) \cosh 2r_i}. \quad (33)$$

Finally, we can estimate  $\text{Haf}(A)$  with a success probability  $1 - \delta$  using number of samples  $N = O(\log \delta^{-1}/\epsilon^2)$  within the additive-error given by

$$\epsilon \prod_{i=1}^M \sqrt{\frac{1}{2} + n(n+1) + (n + \frac{1}{2}) \cosh 2r_i} f'_{\text{st},i}(\beta'^*, r_i, n, \gamma'^*, a_{\min}) := \epsilon \prod_{i=1}^M H_i^A(n, r_i). \quad (34)$$

Next, we give a detailed proof of Theorem 2 in the main text.

**Theorem 2.** (Estimating permanent of HPSD matrices) For an  $M \times M$  HPSD matrix  $B$ , one can approximate  $\text{Per}(B)$  with a success probability  $1 - \delta$  using the number of samples  $O(\log \delta^{-1}/\epsilon^2)$  within the error

$$\epsilon \prod_{i=1}^M \frac{4\lambda_{\max}^2}{e(2\lambda_{\max} - \lambda_i)}, \quad (35)$$

where  $\lambda_i$  are singular values of the matrix  $B$  and  $\lambda_{\max}$  is the largest one.

*Proof.* When a thermal state input with average photon numbers  $\{n_i\}_{i=1}^M$  goes through a linear optical circuit instead of a squeezed vacuum state, the probability of all single-photon outcomes corresponds to the permanent of HPSD matrices [4]. In Ref. [4], an algorithm for estimating the permanent of an HPSD matrix is proposed. Here, we improve the precision of the estimation using  $s$ -PQDs and shifting Gaussian factors. The probability of all single-photon outcomes is connected to the permanent of an HPSD matrix such that [4]

$$p_{\text{th}} = \frac{1}{\mathcal{Z}'} \text{Per}(B'), \quad (36)$$

where  $\mathcal{Z}' = \prod_{i=1}^M (1 + n_i)$ ,  $B' = UDU^\dagger$ , and  $D = \text{diag}\{\frac{n_1}{n_1+1}, \dots, \frac{n_M}{n_M+1}\}$ . Thus if we have an  $M \times M$  HPSD matrix  $B$ , firstly we rescale the matrix with the largest eigenvalue  $\lambda_{\max}$  as  $B' = B/(a\lambda_{\max})$  with  $a > 1$ , and find its unitary diagonalization such as  $B' = UDU^\dagger$  so that we can find a GBS circuit  $U$  with thermal input state  $\{n_i\}_{i=1}^M$ , whose probability matches  $\text{Per}(B')$ . Then,

$$\text{Per}(B) = (a\lambda_{\max})^M \text{Per}(B') = (a\lambda_{\max})^M \mathcal{Z}' p_{\text{th}}. \quad (37)$$

If an estimator of  $\text{Per}(B)$  lies in the interval  $[-C^M, C^M]$ , by Hoeffding's inequality [6],

$$\Pr(|\text{Per}(B) - (a\lambda_{\max})^M \mathcal{Z}' \mu| \geq (a\lambda_{\max})^M \mathcal{Z}' \epsilon) \leq 2 \exp \left( -\frac{N\epsilon^2}{2C^{2M}} \right), \quad (38)$$



where  $\mu$  is the sample mean of  $p_{\text{th}}$ . Thus for the number of samples  $N = O(\log \delta^{-1}/\epsilon^2)$ , we can estimate  $\text{Per}(B)$  with a success probability  $1 - \delta$  within an additive-error  $\epsilon(a\lambda_{\max}C\mathcal{Z}^{1/M})^M$ .

Now we use the same method as in the hafnian case by introducing the shifting parameter  $\gamma \in [0, 1]$ , such as

$$p_{\text{th}} = \int d^{2M} \alpha \prod_{i=1}^M \frac{2}{\pi(2n_i + 1 - s)} e^{-\left(\frac{2}{2n_i+1-s} - \gamma \frac{2}{2n_{\max}+1-s}\right) |\alpha_i|^2} \prod_{j=1}^M \frac{8|\beta_j|^2 + 2(s^2 - 1)}{(s+1)^3} e^{-\left(\frac{2}{s+1} + \gamma \frac{2}{2n_{\max}+1-s}\right) |\beta_j|^2} \quad (40)$$

$$\begin{aligned} &= \int d^{2M} \alpha \prod_{i=1}^M \frac{2}{\pi} \frac{2n_{\max} + 1 - s - \gamma(2n_i + 1 - s)}{(2n_i + 1 - s)(2n_{\max} + 1 - s)} e^{-\left(\frac{2}{2n_i+1-s} - \gamma \frac{2}{2n_{\max}+1-s}\right) |\alpha_i|^2} \\ &\times \prod_{j=1}^M \frac{2n_{\max} + 1 - s}{2n_{\max} + 1 - s - \gamma(2n_j + 1 - s)} \frac{8|\beta_j|^2 + 2(s^2 - 1)}{(s+1)^3} e^{-\left(\frac{2}{s+1} + \gamma \frac{2}{2n_{\max}+1-s}\right) |\beta_j|^2} \end{aligned} \quad (41)$$

$$:= \int d^{2M} \alpha \prod_{i=1}^M P_{\text{th},i}(\alpha_i, n_i, \gamma, s) \prod_{j=1}^M f_{\text{th},j}(\beta_j, n_j, \gamma, s). \quad (42)$$

One can compute the upper bound of  $|f_{\text{th},j}(\beta_j, n_j, \gamma, s)|$  in three different regions of  $\lambda_{\min} = \frac{n_{\min}}{1+n_{\min}} \in [0, 1]$ , as  $\lambda_{\min} = 0$ ,  $0 < \lambda_{\min} < 1/2$ , and  $1/2 \leq \lambda_{\min} < 1$ . We set  $s = s_{\max} = 2n_{\min} + 1$ ,  $n_j = \frac{\lambda_j}{1-\lambda_j}$  and note that the extreme points of  $f_{\text{th},j}(\beta_j, \lambda_j, \gamma, s)$  are at  $0, \pm\beta^*$  with

$$\beta^* = \sqrt{\frac{\lambda_{\min}(\gamma - 2\lambda_{\min} + 1) - \lambda_{\max}((\gamma - 2)\lambda_{\min} + 1)}{(\lambda_{\min} - 1)^2(\gamma(\lambda_{\max} - 1) - \lambda_{\max} + \lambda_{\min})}}. \quad (43)$$

For  $\lambda_{\min} = 0$ , we can find  $\gamma$  satisfying  $\frac{\partial f_j(\beta^*, \lambda_{\max}, \gamma, s_{\max})}{\partial \gamma} = 0$  as

$$\gamma^* = \frac{1 - 2\lambda_{\max}}{2(1 - \lambda_{\max})} \quad \text{for } 0 \leq \lambda_{\max} < \frac{1}{2}. \quad (44)$$

Then an upper bound on the  $|f_{\text{th},j}(\beta_j, \lambda_j, \gamma, s)|$  is obtained as

$$\min_{s, \gamma} \max_{\beta_j} |f_{\text{th},j}(\beta_j, \lambda_j, \gamma, s)| \leq \frac{4\lambda_{\max}^2(1 - \lambda_j)}{e(2\lambda_{\max} - \lambda_j)} \quad \text{for } 0 \leq \lambda_j < \frac{1}{2}. \quad (45)$$

For  $0 < \lambda_{\min} < 1/2$ , we similarly obtain  $\gamma$  as

$$\gamma^* = \frac{\lambda_{\min} + \lambda_{\max}(4\lambda_{\min} - 2) + D - \lambda_{\min}(3\lambda_{\min} + D)}{2\lambda_{\min}(\lambda_{\max} - 1)} \quad \text{for } \lambda_j \leq \frac{\lambda_{\min}^2 + \lambda_{\min} - 1}{3\lambda_{\min} - 2}, \quad (46)$$

where  $D = \sqrt{4\lambda_{\max}^2 - 8\lambda_{\max}\lambda_{\min} + 5\lambda_{\min}^2}$ . Then an upper bound on the  $|f_{\text{th},j}(\beta_j, \lambda_j, \gamma, s)|$  is given by

$$\min_{s, \gamma} \max_{\beta_j} |f_{\text{th},j}(\beta_j, \lambda_j, \gamma, s)| \leq \frac{4(1 - \lambda_j)\lambda_{\min}^2 e^{\frac{\lambda_{\min} - D}{2\lambda_{\max} - 2\lambda_{\min}}} (\lambda_{\max} - \lambda_{\min})^2}{(D - 2\lambda_{\max} + \lambda_{\min})(\lambda_{\min}(D - 4\lambda_{\max} + 3\lambda_{\min}) - \lambda_j(D - 2\lambda_{\max} + \lambda_{\min}))} \quad (47)$$

$$\text{for } \lambda_j \leq \frac{\lambda_{\min}^2 + \lambda_{\min} - 1}{3\lambda_{\min} - 2}. \quad (48)$$

We will consider the case of  $1/2 \leq \lambda_{\min} < 1$  later, in which we achieve a multiplicative-error estimation scheme. To cover the full range of  $\lambda_j$ , we consider the reverse shifting such that

$$p_{\text{th}} = \int d^{2M} \alpha \prod_{i=1}^M \frac{2}{\pi(2n_i + 1 - s)} e^{-\left(\frac{2}{2n_i+1-s} + \gamma' \frac{2}{s+1}\right) |\alpha_i|^2} \prod_{j=1}^M \frac{8|\beta_j|^2 + 2(s^2 - 1)}{(s+1)^3} e^{-(1-\gamma') \frac{2}{s+1} |\beta_j|^2} \quad (49)$$

$$\begin{aligned} &= \int d^{2M} \alpha \prod_{i=1}^M \frac{2}{\pi} \frac{s+1 + \gamma'(2n_i + 1 - s)}{(2n_i + 1 - s)(s+1)} e^{-\left(\frac{2}{2n_i+1-s} + \gamma' \frac{2}{s+1}\right) |\alpha_i|^2} \\ &\times \prod_{j=1}^M \frac{s+1}{s+1 + \gamma'(2n_j + 1 - s)} \frac{8|\beta_j|^2 + 2(s^2 - 1)}{(s+1)^3} e^{-(1-\gamma') \frac{2}{s+1} |\beta_j|^2} \end{aligned} \quad (50)$$

$$:= \int d^{2M} \alpha \prod_{i=1}^M P'_{\text{th},i}(\alpha_i, n_i, \gamma', s) \prod_{j=1}^M f'_{\text{th},j}(\beta_j, n_j, \gamma', s). \quad (51)$$



where  $\gamma' \in (0, 1]$ . When we put  $s = 2n_{\min} + 1$ , the extreme points of  $f'_{\text{th},j}(\beta_j, \lambda_j, \gamma', s)$  are at  $0, \pm\beta'^*$  with

$$\beta'^* = \sqrt{\frac{-\gamma'\lambda_{\min} + 2\lambda_{\min} - 1}{\gamma'\lambda_{\min}^2 - 2\gamma'\lambda_{\min} + \gamma' - \lambda_{\min}^2 + 2\lambda_{\min} - 1}}. \quad (52)$$

For  $\lambda_{\min} = 0$ , the condition  $\frac{\partial f_j(\beta'^*, \lambda_{\max}, \gamma', s_{\max})}{\partial \gamma'} = 0$  yields

$$\gamma'^* = \frac{2\lambda_{\max} - 1}{2\lambda_{\max}}, \quad \text{for } \frac{1}{2} \leq \lambda_{\max} < 1. \quad (53)$$

Then an upper bound of  $|f'_{\text{th},j}(\beta_j, \lambda_j, \gamma', s)|$  is given by

$$\min_{s, \gamma'} \max_{\beta_j} |f'_{\text{th},j}(\beta_j, \lambda_j, \gamma', s)| \leq \frac{4\lambda_{\max}^2(1 - \lambda_j)}{e(2\lambda_{\max} - \lambda_j)}, \quad \text{for } \frac{1}{2} \leq \lambda_j < 1, \quad (54)$$

which is consistent with the bound for  $0 < \lambda_j < \frac{1}{2}$ .

Similarly, when  $0 < \lambda_{\min} < 1/2$ ,

$$\gamma'^* = \frac{\lambda_{\min} + \lambda_{\max}(4\lambda_{\min} - 2) + D - \lambda_{\min}(3\lambda_{\min} + D)}{2\lambda_{\min}(\lambda_{\max} - \lambda_{\min})}, \quad \text{for } \frac{\lambda_{\min}^2 + \lambda_{\min} - 1}{3\lambda_{\min} - 2} \leq \lambda_j < 1 \quad (55)$$

and the corresponding bound is

$$\min_{s, \gamma'} \max_{\beta_j} |f'_{\text{th},j}(\beta_j, \lambda_j, \gamma', s)| \leq \frac{4(1 - \lambda_j)\lambda_{\min}^2 e^{\frac{\lambda_{\min} - D}{2\lambda_{\max} - 2\lambda_{\min}}} (\lambda_{\max} - \lambda_{\min})^2}{(D - 2\lambda_{\max} + \lambda_{\min})(\lambda_{\min}(D - 4\lambda_{\max} + 3\lambda_{\min}) - \lambda_j(D - 2\lambda_{\max} + \lambda_{\min}))}, \quad (56)$$

$$\text{for } \frac{\lambda_{\min}^2 + \lambda_{\min} - 1}{3\lambda_{\min} - 2} \leq \lambda_j < 1. \quad (57)$$

Meanwhile,

$$\mathcal{Z}' = \prod_{i=1}^M (1 + n_i) = \frac{1}{\prod_{i=1}^M (1 - \lambda_i)}. \quad (58)$$

Consequently, for the number of samples  $N = O(\log \delta^{-1}/\epsilon^2)$  and success probability  $1 - \delta$ , we can estimate  $\text{Per}(B)$  when the minimum eigenvalue  $\lambda_{\min} = 0$  within an additive-error as

$$\epsilon \prod_{i=1}^M \frac{4a\lambda_{\max}\lambda_{\max}'^2}{e(2\lambda_{\max}' - \lambda_i')} = \epsilon \prod_{i=1}^M \frac{4\lambda_{\max}^2}{e(2\lambda_{\max} - \lambda_i)}, \quad (59)$$

where  $\lambda_i' = \frac{\lambda_i}{a\lambda_{\max}}$ . □

Let us first compare our result with the existing result [4], where  $\gamma = 0$  and  $s = 1$ . In the latter case, the upper bound on the estimator is such as  $\max |f_j| \leq e^{-1}$ , so thus corresponding additive-error is given by

$$\epsilon \prod_{i=1}^M \frac{1}{e(1 - \lambda_i)}, \quad (60)$$

where we assume  $\lambda_i \in [0, 1)$ . Note that Eq. (59) is smaller than Eq. (60) when  $\lambda_{\max} \in (0, 1/2)$ , so we have a better precision.

Next, we compare our algorithm's precision with Gurvits' randomized algorithm for the permanent of a general complex matrix  $A$  giving the additive-error as  $\epsilon \|A\|^M = \epsilon \lambda_{\max}^M$  with samples  $N = O(M^2/\epsilon^2)$ . Thus from Eq. (59), the necessary and sufficient condition for beating Gurvits' precision is written as

$$\prod_{i=1}^M \frac{4\lambda_{\max}^2}{e(2\lambda_{\max} - \lambda_i)} < \lambda_{\max}^M. \quad (61)$$



To get lower and upper bounds, we put  $\lambda_i = 0$  and  $\lambda_i = \lambda_{\max}$  for all  $i$ , respectively, such as

$$\epsilon(0.736\lambda_{\max})^M \simeq \epsilon \prod_{i=1}^M \frac{2\lambda_{\max}}{e} \leq \epsilon \prod_{i=1}^M \frac{4\lambda_{\max}^2}{e(2\lambda_{\max} - \lambda_i)} \leq \epsilon \prod_{i=1}^M \frac{4\lambda_{\max}}{e} \simeq \epsilon(1.472\lambda_{\max})^M. \quad (62)$$

Also for  $0 < \lambda_{\min} < 1/2$ , the additive-error for  $\text{Per}(B)$  is given by

$$\epsilon \prod_{i=1}^M \frac{4a\lambda_{\max}\lambda_{\min}'^2 e^{\frac{\lambda_{\min}' - D'}{2\lambda_{\max}' - 2\lambda_{\min}'}} (\lambda_{\max}' - \lambda_{\min}')^2}{(D' - 2\lambda_{\max}' + \lambda_{\min}')(\lambda_{\min}'(D' - 4\lambda_{\max}' + 3\lambda_{\min}') - \lambda_i'(D' - 2\lambda_{\max}' + \lambda_{\min}'))} \quad (63)$$

$$= \epsilon \prod_{i=1}^M \frac{4\lambda_{\min}^2 e^{\frac{\lambda_{\min} - D}{2\lambda_{\max} - 2\lambda_{\min}}} (\lambda_{\max} - \lambda_{\min})^2}{(D - 2\lambda_{\max} + \lambda_{\min})(\lambda_{\min}(D - 4\lambda_{\max} + 3\lambda_{\min}) - \lambda_i(D - 2\lambda_{\max} + \lambda_{\min}))} := \epsilon \prod_{i=1}^M H_i^B(\lambda_i), \quad (64)$$

where  $D' = \sqrt{4\lambda_{\max}'^2 - 8\lambda_{\max}'\lambda_{\min}' + 5\lambda_{\min}'^2}$ . Similarly, the necessary and sufficient condition for beating Gurvits' is given by

$$\prod_{i=1}^M H_i^B(\lambda_i) < \lambda_{\max}^M. \quad (65)$$

Our method is also applicable to another matrix function, called Torontonian. The Torontonian of a  $2M \times 2M$  complex matrix  $A'$  is defined as [7]

$$\text{Tor}(A') = \sum_{Z \in P([M])} (-1)^{|Z|} \frac{1}{\sqrt{\det(\mathbb{I} - A'_{(Z)})}}, \quad (66)$$

where  $P([M])$  is the power set of  $[M] := \{1, 2, \dots, M\}$  and the matrix  $A'$  has block structure such that

$$A' = \begin{pmatrix} B^T & R^* \\ R & B \end{pmatrix}, \quad (67)$$

where  $B$  is HPSD and  $R$  is symmetric. Let us first consider a special case  $B = 0$ , which corresponds to a GBS with pure squeezed input state  $\{r_i\}_{i=1}^M$ . The probability of all threshold detectors “click” in a GBS circuit is related to the Torontonian as

$$p_{\text{on|sq}} = \frac{1}{\sqrt{|V_Q|}} \text{Tor}(\mathbb{I}_{2M} - V_Q^{-1}) = \frac{1}{\mathcal{Z}} \text{Tor} \begin{pmatrix} 0 & R^* \\ R & 0 \end{pmatrix}, \quad (68)$$

where  $V_Q = V + \mathbb{I}/2$  with the covariance matrix  $V$ ,  $\Pi_0 = |0\rangle\langle 0|$ ,  $\mathcal{Z} = \prod_i^M \cosh r_i$ ,  $R = UDU^T$ , and  $D = \oplus_i^M \tanh r_i$ . Meanwhile, the probability  $p_{\text{on|sq}}$  can be written in terms of  $s$ -PQDs as

$$p_{\text{on|sq}} = \int d^{2M} \alpha \prod_{i=1}^M P_{\text{sq},i}(\alpha_i, r_i, \gamma, s) \prod_{j=1}^M f_{\text{on|sq},j}(\beta_j, r_j, \gamma, s), \quad (69)$$

where  $P_{\text{sq},i}(\alpha_i, r_i, \gamma, s)$  is given in Eq. (10) and  $f_{\text{on|sq},j}(\beta_j, r_j, \gamma, s)$  is defined as

$$f_{\text{on|sq},j}(\beta_j, r_j, \gamma, s) = \sqrt{\frac{e^{2r_{\max}} - s}{e^{2r_{\max}} - s - \gamma(e^{2r_j} - s)}} \sqrt{\frac{e^{2r_{\max}} - s}{e^{2r_{\max}} - s - \gamma(e^{-2r_j} - s)}} \left(1 - \frac{2}{s+1} e^{-\frac{2}{s+1}|\beta_j|^2}\right) e^{-\gamma \frac{2}{e^{2r_{\max}} - s} |\beta_j|^2}. \quad (70)$$

We set  $s = s_{\max} = e^{-2r_{\max}}$  and  $r_j = \tanh^{-1} \lambda_j$ . The extreme points are at  $0, \pm\beta^*$  with

$$\beta^* = \sqrt{\frac{1}{\lambda_{\max} + 1} \log \left( \frac{(\lambda_{\max} + 1)(\gamma(\lambda_{\max} - 1) - 2\lambda_{\max})}{\gamma(\lambda_{\max} - 1)} \right)}. \quad (71)$$



After we choose  $\gamma^* = \frac{1}{2}(1 - \lambda_{\max})$ , the corresponding upper bound is given by

$$\min_{s, \gamma} \max_{\beta_j} |f_{\text{on},j}(\beta_j, \lambda_j, \gamma, s)| \quad (72)$$

$$\leq \frac{16\sqrt{1 - \lambda_{\max}^2} \lambda_{\max}^2}{(1 + \lambda_{\max}^3) \sqrt{\{\lambda_i + (\lambda_i + 3)\lambda_{\max} - \lambda_{\max}^2\} \{-\lambda_i - (\lambda_i - 3)\lambda_{\max} - \lambda_{\max}^2\}}} \left[ \frac{(1 + \lambda_{\max})^3}{(1 - \lambda_{\max})^2} \right]^{-\frac{(1 - \lambda_{\max})^2}{4\lambda_{\max}}}, \quad (73)$$

Therefore, with success probability  $1 - \delta$ , we can estimate the Torontonian of a matrix  $\begin{pmatrix} 0 & R^* \\ R & 0 \end{pmatrix}$  using the number of samples  $O(\log \delta^{-1}/\epsilon^2)$  within an additive-error

$$\epsilon \prod_{i=1}^M \frac{16\lambda_{\max}^2}{(1 + \lambda_{\max}^3) \sqrt{\{\lambda_i + (\lambda_i + 3)\lambda_{\max} - \lambda_{\max}^2\} \{-\lambda_i - (\lambda_i - 3)\lambda_{\max} - \lambda_{\max}^2\}}} \left[ \frac{(1 + \lambda_{\max})^3}{(1 - \lambda_{\max})^2} \right]^{-\frac{(1 - \lambda_{\max})^2}{4\lambda_{\max}}} := \epsilon \prod_{i=1}^M T_i(\lambda_i). \quad (74)$$

Next, we consider a special case where  $R = 0$  corresponds to a thermal input state  $\{n_i\}_{i=1}^M$ . In that case,

$$p_{\text{on|th}} = \frac{1}{\mathcal{Z}'} \text{Tor} \begin{pmatrix} B^T & 0 \\ 0 & B \end{pmatrix}, \quad (75)$$

where  $\mathcal{Z}' = \prod_{i=1}^M (1 + n_i)$ ,  $B = UDU^\dagger$ , and  $D = \text{diag}\{\frac{n_1}{n_1+1}, \dots, \frac{n_M}{n_M+1}\}$ . Meanwhile, the probability  $p_{\text{on|th}}$  can also be written as

$$p_{\text{on|th}} = \int d^{2M} \alpha \prod_{i=1}^M P_{\text{th},i}(\alpha_i, n_i, \gamma, s) \prod_{j=1}^M f_{\text{on|th},j}(\beta_j, n_j, \gamma, s), \quad (76)$$

where  $P_{\text{th},i}(\alpha_i, n_i, \gamma, s)$  is given in Eq. (42) and  $f_{\text{on|th},j}(\beta_j, n_j, \gamma, s)$  is defined as

$$f_{\text{on|th},j}(\beta_j, n_j, \gamma, s) = \frac{2n_{\max} + 1 - s}{2n_{\max} + 1 - s - \gamma(2n_j + 1 - s)} \left( 1 - \frac{2}{s+1} e^{-\frac{2}{s+1} |\beta_j|^2} \right) e^{-\gamma \frac{2}{2n_{\max}+1-s} |\beta_j|^2}. \quad (77)$$

We set  $s = s_{\max} = 2n_{\min} + 1$  and  $n_j = \frac{\lambda_j}{1 - \lambda_j}$ . The extreme points are at  $0, \pm\beta^*$  with

$$\beta^* = \sqrt{\frac{1}{\lambda_{\min} - 1} \log \left( \frac{\gamma - \gamma\lambda_{\max}}{(\lambda_{\min} - 1)(\gamma\lambda_{\max} - \gamma - \lambda_{\max} + \lambda_{\min})} \right)}. \quad (78)$$

Choosing  $\gamma^* = \frac{1}{2}(1 - \lambda_{\max})$ , an upper bound on  $|f_{\text{on|th},j}(\beta_j, \lambda_j, \gamma, s)|$  is given by

$$\min_{s, \gamma} \max_{\beta_j} |f_{\text{on|th},j}(\beta_j, \lambda_j, \gamma, s)| \leq \frac{4(1 - \lambda_j)(\lambda_{\max} - \lambda_{\min})^2 \left( \frac{(1 - \lambda_{\max})^2}{(1 - \lambda_{\min})(1 + \lambda_{\max}^2 - 2\lambda_{\min})} \right)^{\frac{1 + \lambda_{\max}^2 - 2\lambda_{\min}}{2\lambda_{\max} - 2\lambda_{\min}}} (\lambda_{\min} - 1)}{(1 - \lambda_{\max})^2 \{\lambda_j(1 + \lambda_{\max}^2 - 2\lambda_{\min}) + \lambda_{\min} - \lambda_{\max}(2 + (\lambda_{\max} - 2)\lambda_{\min})\}}. \quad (79)$$

Therefore, we can estimate Torontonian of a matrix  $\begin{pmatrix} B^T & 0 \\ 0 & B \end{pmatrix}$  with success probability  $1 - \delta$  using number of samples  $O(\log \delta^{-1}/\epsilon^2)$  within an additive-error

$$\epsilon \prod_{i=1}^M \frac{4(\lambda_{\max} - \lambda_{\min})^2 \left[ \frac{(1 - \lambda_{\max})^2}{(1 - \lambda_{\min})(1 + \lambda_{\max}^2 - 2\lambda_{\min})} \right]^{\frac{1 + \lambda_{\max}^2 - 2\lambda_{\min}}{2\lambda_{\max} - 2\lambda_{\min}}} (\lambda_{\min} - 1)}{(1 - \lambda_{\max})^2 \{\lambda_i(1 + \lambda_{\max}^2 - 2\lambda_{\min}) + \lambda_{\min} - \lambda_{\max}(2 + (\lambda_{\max} - 2)\lambda_{\min})\}} := \epsilon \prod_{i=1}^M T_i^B(\lambda_i). \quad (80)$$

Finally, we consider a matrix  $A'$  defined by Eq. (67), satisfying Eqs. (25) and (26). Then the Torontonian of matrix  $A'$  is related with a squeezed thermal input state  $\{r_i, n\}_{i=1}^M$  such that

$$p_{\text{on|st}} = \frac{\text{Tor}(A')}{\sqrt{|V_Q|}}. \quad (81)$$



Meanwhile,  $p_{\text{on|st}}$  is also can be written as

$$p_{\text{on|st}} = \int d^{2M} \alpha \prod_{i=1}^M \frac{2}{\pi \sqrt{(a_+(r_i, n) - s)(a_-(r_i, n) - s)}} e^{-\frac{2\alpha_{ix}^2}{a_+(r_i, n) - s} - \frac{2\alpha_{iy}^2}{a_-(r_i, n) - s}} \prod_{j=1}^M \left(1 - \frac{2}{s+1} e^{-\frac{2}{s+1} |\beta_j|^2}\right) \quad (82)$$

$$= \int d^{2M} \alpha \prod_{i=1}^M \frac{2}{\pi \sqrt{(a_+(r_i, n) - s)(a_-(r_i, n) - s)}} e^{-\left(\frac{2}{a_+(r_i, n) - s} - \gamma \frac{2}{a_{\max} - s}\right) \alpha_{ix}^2 - \left(\frac{2}{a_-(r_i, n) - s} - \gamma \frac{2}{a_{\max} - s}\right) \alpha_{iy}^2} \\ \times \prod_{j=1}^M \left(1 - \frac{2}{s+1} e^{-\frac{2}{s+1} |\beta_j|^2}\right) e^{-\gamma \frac{2}{a_{\max} - s} |\beta_j|^2} \quad (83)$$

$$= \int d^{2M} \alpha \prod_{i=1}^M \frac{2}{\pi} \sqrt{\frac{a_{\max} - s - \gamma(a_+(r_i, n) - s)}{(a_+(r_i, n) - s)(a_{\max} - s)}} \sqrt{\frac{a_{\max} - s - \gamma(a_-(r_i, n) - s)}{(a_-(r_i, n) - s)(a_{\max} - s)}} e^{-\left(\frac{2}{a_+(r_i, n) - s} - \gamma \frac{2}{a_{\max} - s}\right) \alpha_{ix}^2 - \left(\frac{2}{a_-(r_i, n) - s} - \gamma \frac{2}{a_{\max} - s}\right) \alpha_{iy}^2} \\ \times \prod_{j=1}^M \sqrt{\frac{a_{\max} - s}{a_{\max} - s - \gamma(a_+(r_j, n) - s)}} \sqrt{\frac{a_{\max} - s}{a_{\max} - s - \gamma(a_-(r_j, n) - s)}} \left(1 - \frac{2}{s+1} e^{-\frac{2}{s+1} |\beta_j|^2}\right) e^{-\gamma \frac{2}{a_{\max} - s} |\beta_j|^2} \quad (84)$$

$$:= \int d^{2M} \alpha \prod_{i=1}^M P_{\text{st},i}(\alpha_i, r_i, n, \gamma, s) \prod_{j=1}^M f_{\text{on|st},j}(\beta_j, r_j, n, \gamma, s). \quad (85)$$

where  $a_{\pm}(r_i, n) = (2n+1)e^{\pm 2r_i}$ ,  $a_{\max} = (2n+1)e^{2r_{\max}}$ , and  $a_{\min} = (2n+1)e^{-2r_{\max}}$ . We set  $s = s_{\max} = a_{\min}$  and note the extreme points are  $0, \pm\beta^*$  with

$$\beta^* = \sqrt{\frac{1}{2} ((2n+1)e^{-2r_{\max}} + 1) \log \left( \frac{2e^{2r_{\max}} ((\gamma-1)(2n+1) + (2n+1)e^{4r_{\max}} + \gamma e^{2r_{\max}})}{\gamma (2n + e^{2r_{\max}} + 1)^2} \right)} \quad (86)$$

By choosing  $\gamma^* = \frac{e^{-\tanh r_{\max}}}{n+1}$ , an upper bound on  $|f_{\text{on|st},j}(\beta_j, r_j, n, \gamma, s)|$  is given by

$$|f_{\text{on|st},j}(\beta_j, r_j, n, \gamma, s)| \leq f_{\text{on|st},j}(\beta_j^*, r_j, n, \gamma^*, a_{\min}) \quad (87)$$

$$= \frac{(n+1)^2 (2n+1) (e^{4r_{\max}} - 1)^2 e^{r_j + 2r_{\max} + 2 \tanh(r_{\max})}}{(2n + e^{2r_{\max}} + 1)^2} \sqrt{\frac{1}{(n+1) (-e^{\tanh(r_{\max})}) + (n+1) e^{4r_{\max} + \tanh(r_{\max})} - e^{2(r_j + r_{\max})} + 1}} \quad (88)$$

$$\times \sqrt{\frac{1}{(n+1) (-e^{2r_j + \tanh(r_{\max})}) + (n+1) e^{2r_j + 4r_{\max} + \tanh(r_{\max})} + e^{2r_j} - e^{2r_{\max}}}} 2^F \quad (89)$$

$$\times \left( \frac{e^{2r_{\max}} (-(2n^2 + 3n + 1) e^{\tanh(r_{\max})} + (2n^2 + 3n + 1) e^{4r_{\max} + \tanh(r_{\max})} + 2n + e^{2r_{\max}} + 1)}{(2n + e^{2r_{\max}} + 1)^2} \right)^F, \quad (90)$$

$$F = -\frac{e^{-\tanh(r_{\max})} (n \tanh(r_{\max}) + (n+1) \coth(r_{\max}) - 2n - 1)}{2(n+1)(2n+1)}. \quad (91)$$

Therefore, we can estimate the Torontonian of a matrix  $\begin{pmatrix} C^T & R^* \\ R & C \end{pmatrix}$  with a success probability  $1 - \delta$  for number of samples  $O(\log \delta^{-1} / \epsilon^2)$  within an additive-error as

$$\epsilon \prod_{i=1}^M \sqrt{\frac{1}{2} + n(n+1) + (n + \frac{1}{2}) \cosh 2r_i} f_{\text{on|st},i}(\beta^*, r_i, n, \gamma^*, a_{\min}) := \epsilon \prod_{i=1}^M T_i^A(n, r_i). \quad (92)$$

## SUPPLEMENTARY NOTE 2 (ESTIMATION OF MATRIX FUNCTIONS WITHIN MULTIPLICATIVE-ERRORS)

The previous section investigates the efficient estimation schemes for various matrix functions within additive-errors. This section proposes a much stronger scheme, such as estimations within multiplicative-errors. We show that for



highly classical input states, the  $s$ -PQDs representations of the outcome probabilities corresponding to those matrix functions can be written as integrals of log-concave functions. Then we can use an FPRAS to approximate the matrix functions.

Recently, it has been proven that the multiplicative-error estimation of an HPSD matrix is NP-hard [2]. The case of a Hermitian positive definite matrix, i.e.,  $\lambda_{\min} > 0$ , is still unknown yet, but introduced an FPRAS for  $1 \leq \lambda_i \leq 2$  [3]. In this section, we reproduce the same result by showing the log-concavity for  $\lambda_{\max}/\lambda_{\min} \leq 2$ . By a slight generalization of the result in Ref. [3], we give a following lemma:

**Lemma 1.** Let  $a, b, c \geq 0$  and  $q : \mathbb{R}^M \rightarrow \mathbb{R}_+$  is a positive semidefinite quadratic form. Then the function  $(a + bq(x))e^{-cq(x)}$  is log-concave when  $ca \geq b$ .

*Proof.* It is enough to show the function

$$h(x) = \log(a + bq(x)) - cq(x) \quad (93)$$

is concave when  $ca \geq b > 0$ . This leads to check that  $h$  onto any affine line  $x(\tau) = \alpha\tau + \beta$  with  $\alpha, \beta \in \mathbb{R}^M$  is concave. Via the affine substitution  $\tau := (\tau - \beta)/\alpha$ , what we need to check is  $g''(\tau) \leq 0$  for all  $\tau \in \mathbb{R}$ , where

$$g(\tau) = \log(a + b(\tau^2 + \gamma^2)) - c(\tau^2 + \gamma^2). \quad (94)$$

Then by straightforward calculation,

$$\begin{aligned} g''(\tau) &= -2c - \frac{4b^2\tau^2}{(a + b(\gamma^2 + \tau^2))^2} + \frac{2b}{a + b(\gamma^2 + \tau^2)} \\ &= \frac{2b(a + b(\gamma^2 + \tau^2)) - 2c(a + b(\gamma^2 + \tau^2))^2 - 4b^2\tau^2}{(a + b(\gamma^2 + \tau^2))^2} \\ &= \frac{-2a(ca - b) - 2b(\gamma^2 + \tau^2)(ca - b) - 2abc(\gamma^2 + \tau^2) - 4b^2\tau^2 - 2b^2(\gamma^2 + \tau^2)^2}{(a + b(\gamma^2 + \tau^2))^2} \\ &\leq 0 \quad \text{for } ca \geq b. \end{aligned}$$

□

From Eq. (40),

$$f_{\text{th},j}(\beta_j, n_i, \gamma, s) \propto \frac{8|\beta_j|^2 + 2(s^2 - 1)}{(s + 1)^3} e^{-\left(\frac{2}{s+1} + \gamma \frac{2}{2n_{\max} + 1 - s}\right)|\beta_j|^2}. \quad (95)$$

Therefore, the condition for log-concavity of  $f_{\text{th},j}(\beta_j, n_i, \gamma, s)$  is written as

$$\left( \frac{2}{s + 1} + \gamma \frac{2}{2n_{\max} + 1 - s} \right) 2(s^2 - 1) \geq 8. \quad (96)$$

After putting  $\gamma = 1$  and  $s = s_{\max} = 2n_{\min} + 1$ ,

$$\frac{n_{\max}}{n_{\max} + 2} \leq n_{\min}. \quad (97)$$

Substituting  $n_i = \frac{\lambda_i}{1 - \lambda_i}$ ,

$$\frac{\lambda_{\max}}{\lambda_{\min}} \leq 2, \quad (98)$$

as desired.

When the input is a squeezed thermal state  $\{r_i, n\}_{i=1}^M$ , we can find the condition for multiplicative estimation of the hafnian of a particular matrix, which proves Theorem 3 in the main text.

**Theorem 3.** (FPRAS for hafnian) Suppose we have a block matrix  $A = \begin{pmatrix} R & B \\ B^T & R^* \end{pmatrix}$  with an  $M \times M$  complex symmetric matrix  $R$  and an  $M \times M$  HPSD matrix  $B$ , which have decompositions Eqs. (25, 26), then  $\text{Haf}(A)$  can be approximated by FPRAS when the parameters satisfy a condition as

$$n \geq \frac{1}{4} \left( 6 \sinh(2r_{\max}) + \sqrt{18 \cosh(4r_{\max}) - 14} - 2 \right), \quad (99)$$

where  $r_{\max} = \max_i r_i$ .



*Proof.* Note that the estimated function in the case of all single-photon outcomes is given by

$$f_{\text{st},j}(\beta_j, r_j, n, \gamma, s) \propto \frac{8|\beta_j|^2 + 2(s^2 - 1)}{(s+1)^3} e^{-\left(\frac{2}{s+1} + \gamma \frac{2}{a_{\max}-s}\right)|\beta_j|^2}, \quad (100)$$

where  $a_{\max} = (2n+1)e^{2r_{\max}}$ . Then from Lemma. 1, the condition for log-concavity of  $f_{\text{st},j}(\beta_j, r_j, n, \gamma, s)$  is

$$n \geq \frac{1}{4} \left( 6 \sinh(2r_{\max}) + \sqrt{18 \cosh(4r_{\max}) - 14} - 2 \right), \quad (101)$$

where we put  $\gamma = 1$  and  $s = s_{\max} = (2n+1)e^{-2r_{\max}}$ . Thus for a matrix  $A = \begin{pmatrix} R & B \\ B^T & R^* \end{pmatrix}$  satisfying conditions Eqs. (25) and (26),  $\text{Haf}(A)$  can be estimated within a multiplicative-error efficiently when Eq. (101) holds.  $\square$

Furthermore, we can apply the same method to the Torontonian. Here, we use the following lemma:

**Lemma 2.** Let  $a, b, c \geq 0$  and  $q : \mathbb{R}^M \rightarrow \mathbb{R}_+$  is a positive semidefinite quadratic form. Then the function  $(a - be^{-bq(x)})e^{-cq(x)}$  is log-concave when  $a \geq \frac{b^2+2bc}{c}$ .

*Proof.* By the same argument in Lemma. 1, what we need to check is  $g''(\tau) \leq 0$  for all  $\tau \in \mathbb{R}$ , where

$$g(\tau) = \log(a - be^{-b(\tau^2+\gamma^2)}) - c(\tau^2 + \gamma^2). \quad (102)$$

By a straightforward calculation,

$$g''(\tau) = -2c + \frac{-2b^3 - 2ab^2(2b\tau^2 - 1)e^{b(\gamma^2+\tau^2)}}{(b - ae^{b(\gamma^2+\tau^2)})^2} \quad (103)$$

$$= \frac{-2c \left( b^2 - 2abe^{b(\gamma^2+\tau^2)} + a^2e^{2b(\gamma^2+\tau^2)} \right) - 2b^3 - 4ab^3\tau^2e^{b(\gamma^2+\tau^2)} + 2ab^2e^{b(\gamma^2+\tau^2)}}{(b - ae^{b(\gamma^2+\tau^2)})^2} \quad (104)$$

$$= \frac{-2cb^2e^{-b(\gamma^2+\tau^2)} + 4abc - 2a^2ce^{b(\gamma^2+\tau^2)} - 2b^3e^{-b(\gamma^2+\tau^2)} - 4ab^3\tau^2 + 2ab^2}{e^{-b(\gamma^2+\tau^2)}(b - ae^{b(\gamma^2+\tau^2)})^2} \quad (105)$$

$$\leq \frac{-2cb^2e^{-b(\gamma^2+\tau^2)} + 4abc - 2a^2c - 2b^3e^{-b(\gamma^2+\tau^2)} - 4ab^3\tau^2 + 2ab^2}{e^{-b(\gamma^2+\tau^2)}(b - ae^{b(\gamma^2+\tau^2)})^2} \quad (106)$$

$$\leq 0 \quad \text{for } a \geq \frac{b^2+2bc}{c}.$$

$\square$

First we consider thermal input state  $\{n_i\}_{i=1}^M$ . From Eq. (77),

$$f_{\text{on|th},j}(\beta_j, n_j, \gamma, s) \propto \left( 1 - \frac{2}{s+1} e^{-\frac{2}{s+1}|\beta_j|^2} \right) e^{-\gamma \frac{2}{2n_{\max}+1-s}|\beta_j|^2}. \quad (107)$$

By Lemma. 2, the function  $(a - be^{-b|\beta|^2})e^{-c|\beta|^2}$  is log-concave when  $a \geq \frac{b^2+2bc}{c}$ . Consequently, the condition for log-concavity of  $f_{\text{on|th},j}(\beta_j, n_j, \gamma, s)$  is written as

$$\frac{2(3 + 2n_{\max} + s)}{(1+s)^2} \leq 1. \quad (108)$$

When  $\gamma = 1$  and  $s = s_{\max} = 2n_{\min} + 1$ , this condition yields

$$\frac{1}{2} \leq \lambda_{\min} \leq \lambda_{\max} \leq \frac{-\lambda_{\min}^2 + 3\lambda_{\min} - 1}{\lambda_{\min}}, \quad (109)$$

where  $\lambda_j = \frac{n_j}{1+n_j}$ . Thus for an HPSD matrix  $B$ ,  $\text{Tor} \begin{pmatrix} B^T & 0 \\ 0 & B \end{pmatrix}$  can be estimated within a multiplicative-error when eigenvalues  $\{\lambda_i\}$  of  $C$  satisfy the condition Eq. (109). Note that this condition is more stringent than the permanent case in which there is no restriction for  $\lambda_{\max}$  when  $\lambda_{\min} \geq \frac{1}{2}$ .



Next, when the input is a squeezed thermal state  $\{r_i, n\}_{i=1}^M$ ,  $f_{\text{on|st},j}(\beta_j, r_j, n, \gamma, s)$  is given by

$$f_{\text{on|st},j}(\beta_j, r_j, n, \gamma, s) \propto \left(1 - \frac{2}{s+1} e^{-\frac{2}{s+1}|\beta_j|^2}\right) e^{-\gamma \frac{2}{a_{\max}-s}|\beta_j|^2}, \quad (110)$$

where  $a_{\max} = (2n+1)e^{2r_{\max}}$ . If we set  $\gamma = 1$  and  $s = s_{\max} = (2n+1)e^{-2r_{\max}}$ , the condition for log-concavity of  $f_{\text{on|st},j}(\beta_j, r_j, n, \gamma, s)$  is given by using Lemma. 2

$$n \geq \frac{1}{2} \left( e^{2r_{\max}} \sqrt{e^{8r_{\max}} + 3} + e^{6r_{\max}} - 1 \right). \quad (111)$$

Thus for a matrix  $A' = \begin{pmatrix} B^T & R^* \\ R & B \end{pmatrix}$  satisfying Eqs. (25) and (26), we can estimate the Torontonian with multiplicative-error when the above condition is satisfied.

### SUPPLEMENTARY NOTE 3 (LOWER AND UPPER BOUNDS ON MATRIX FUNCTIONS)

So far, we have suggested polynomial-time randomized algorithms for estimating various matrix functions. Here, we provide lower and upper bounds on the matrix functions by using  $s$ -PQD and appropriately choosing  $s$ , which is summarized in Supplementary Table II.

From Eq. (37), the permanent of an HPSD matrix is connected to a GBS circuit with a thermal state input. The probability of all single-photon measurements is written as

$$p_{\text{th}} = \int d^{2M} \alpha \prod_{i=1}^M \frac{2}{\pi(2n_i+1-s)} e^{-\frac{2}{(2n_i+1-s)}|\alpha_i|^2} \prod_{j=1}^M \frac{8|\beta_j|^2 + 2(s^2-1)}{(s+1)^3} e^{-\frac{2}{s+1}|\beta_j|^2} \quad (112)$$

$$\leq \frac{2}{\prod_{i=1}^M \pi(2n_i+1-s)} \int d^{2M} \alpha \prod_{i=1}^M e^{-\frac{2}{2n_{\max}+1-s}|\alpha_i|^2} \prod_{j=1}^M \frac{8|\beta_j|^2 + 2(s^2-1)}{(s+1)^3} e^{-\frac{2}{s+1}|\beta_j|^2} \quad (113)$$

$$= \frac{2}{\prod_{i=1}^M \pi(2n_i+1-s)} \int d^{2M} \beta \prod_{j=1}^M \frac{8|\beta_j|^2 + 2(s^2-1)}{(s+1)^3} e^{-\left(\frac{2}{s+1} + \frac{2}{2n_{\max}+1-s}\right)|\beta_j|^2} \quad (114)$$

$$= \prod_{i=1}^M (1 - \lambda_i) \frac{\lambda_{\max} \{ \lambda_{\max}(2 + \lambda_{\min}) - 2 - 3\lambda_{\min} \}}{\lambda_i(2 + \lambda_{\min}) - 2 - 3\lambda_{\min}}, \quad (115)$$

where the inequality is valid when  $s \geq 1$ . Note that we take  $s = 2n_{\min} + 1$  and  $n_i = \frac{\lambda_i}{1-\lambda_i}$  in the last equality.

Thus the permanent of an HPSD matrix  $B$  are bounded from above as

$$\text{Per}(B) = p_{\text{th}} \mathcal{Z}' \leq \prod_{i=1}^M \frac{\lambda_{\max} \{ \lambda_{\max}(2 + \lambda_{\min}) - 2 - 3\lambda_{\min} \}}{\lambda_i(2 + \lambda_{\min}) - 2 - 3\lambda_{\min}} := \prod_{i=1}^M G_i(\lambda_i). \quad (116)$$

For the lower bound, our method gives the same result in Ref. [4].

Let us set  $a_{i,\pm}(r_i, n) = (2n+1)e^{\pm 2r_i}$ ,  $a_{\min} = (2n+1)e^{-2r_{\max}}$ , and  $a_{\max} = (2n+1)e^{2r_{\max}}$ . When the input state is a squeezed thermal state  $\{r_i, n\}_{i=1}^M$  with a fixed  $n$ , the probability of all single-photon detection is

$$p_{\text{st}} = \int d^{2M} \alpha \prod_{i=1}^M \frac{2}{\pi \sqrt{(a_+(r_i, n) - s)(a_-(r_i, n) - s)}} e^{-\frac{2\alpha_{ix}^2}{a_+(r_i, n) - s} - \frac{2\alpha_{iy}^2}{a_-(r_i, n) - s}} \prod_{j=1}^M \frac{8|\beta_j|^2 + 2(s^2-1)}{(s+1)^3} e^{-\frac{2|\beta_j|^2}{s+1}} \quad (117)$$

$$\geq \frac{2}{\prod_{i=1}^M \pi \sqrt{(a_+(r_i, n) - s)(a_-(r_i, n) - s)}} \int d^{2M} \alpha \prod_{i=1}^M e^{-\frac{2|\alpha_i|^2}{a_{\min}-s}} \prod_{j=1}^M \frac{8|\beta_j|^2 + 2(s^2-1)}{(s+1)^3} e^{-\frac{2|\beta_j|^2}{s+1}} \quad (118)$$

$$= \frac{2}{\prod_{i=1}^M \pi \sqrt{(a_+(r_i, n) - s)(a_-(r_i, n) - s)}} \int d^{2M} \beta \prod_{j=1}^M \frac{8|\beta_j|^2 + 2(s^2-1)}{(s+1)^3} e^{-\left(\frac{2}{s+1} + \frac{2}{a_{\min}-s}\right)|\beta_j|^2} \quad (119)$$

$$= \prod_{i=1}^M \frac{2(-2n + e^{2r_{\max}} - 1)^2}{(2n + e^{2r_{\max}} + 1)^2 \sqrt{-2(2n+1) \cosh(2r_i) + 4n(n+1) + 2}}, \quad (120)$$



where the inequality holds for  $s \geq 1$ , and we put  $s = 1$  for the last equality. Here, assume  $a_{\min} \geq 1$ . Then for a matrix  $A = \begin{pmatrix} R & B \\ B^T & R^* \end{pmatrix}$  satisfying Eqs. (25) and (26), a lower bound of the Hafnian is written as

$$\text{Haf}(A) = p_{\text{st}} \mathcal{Z}'' \geq \prod_{i=1}^M \left( \frac{-2n + e^{2r_{\max}} - 1}{2n + e^{2r_{\max}} + 1} \right)^2 \frac{\sqrt{\frac{1}{2} + n(n+1) + (n + \frac{1}{2}) \cosh 2r_i}}{\sqrt{\frac{1}{2} + n(n+1) - (n + \frac{1}{2}) \cosh 2r_i}} := \prod_{i=1}^M L_i^H(r_i, n), \quad (121)$$

$$\mathcal{Z}'' = \sqrt{|V_Q|} = \prod_{i=1}^M \sqrt{\frac{1}{2} + n(n+1) + (n + \frac{1}{2}) \cosh 2r_i}. \quad (122)$$

Similarly, an upper bound can be obtained as

$$p_{\text{st}} = \int d^{2M} \alpha \prod_{i=1}^M \frac{2}{\pi \sqrt{(a_+(r_i, n) - s)(a_-(r_i, n) - s)}} e^{-\frac{2\alpha_{ix}^2}{a_+(r_i, n) - s} - \frac{2\alpha_{iy}^2}{a_-(r_i, n) - s}} \prod_{j=1}^M \frac{8|\beta_j|^2 + 2(s^2 - 1)}{(s+1)^3} e^{-\frac{2|\beta_j|^2}{s+1}} \quad (123)$$

$$\leq \frac{2}{\prod_{i=1}^M \pi \sqrt{(a_+(r_i, n) - s)(a_-(r_i, n) - s)}} \int d^{2M} \alpha \prod_{i=1}^M e^{-\frac{2|\alpha_i|^2}{a_{\max} - s}} \prod_{j=1}^M \frac{8|\beta_j|^2 + 2(s^2 - 1)}{(s+1)^3} e^{-\frac{2|\beta_j|^2}{s+1}} \quad (124)$$

$$= \frac{2}{\prod_{i=1}^M \pi \sqrt{(a_+(r_i, n) - s)(a_-(r_i, n) - s)}} \int d^{2M} \beta \prod_{j=1}^M \frac{8|\beta_j|^2 + 2(s^2 - 1)}{(s+1)^3} e^{-(\frac{2}{s+1} + \frac{2}{a_{\max} - s})|\beta_j|^2} \quad (125)$$

$$= \prod_{i=1}^M \left( \frac{e^{r_{\max}} n + \sinh r_{\max}}{(1+n) \cosh r_{\max} + n \sinh r_{\max}} \right)^2 \frac{1}{\sqrt{\frac{1}{2} + n(n+1) - (n + \frac{1}{2}) \cosh 2r_i}}, \quad (126)$$

where we put  $s = 1$  for the last inequality. Consequently, an upper bound is obtained as

$$\text{Haf}(A) = p_{\text{st}} \mathcal{Z}'' \leq \prod_{i=1}^M \left( \frac{e^{r_{\max}} n + \sinh r_{\max}}{(1+n) \cosh r_{\max} + n \sinh r_{\max}} \right)^2 \frac{\sqrt{\frac{1}{2} + n(n+1) + (n + \frac{1}{2}) \cosh 2r_i}}{\sqrt{\frac{1}{2} + n(n+1) - (n + \frac{1}{2}) \cosh 2r_i}} := \prod_{i=1}^M G_i^H(r_i, n). \quad (127)$$

Moreover, our approach can apply to bounds on the Torontonian. First, we consider thermal state input  $\{n_i\}_{i=1}^M$  and the probability of all “click” outcomes is written as

$$p_{\text{on|th}} = \int d^{2M} \alpha \prod_{i=1}^M \frac{2}{\pi(2n_i + 1 - s)} e^{-\frac{2}{2n_i + 1 - s} |\alpha_i|^2} \prod_{j=1}^M \left( 1 - \frac{2}{s+1} e^{-\frac{2}{s+1} |\beta_j|^2} \right) \quad (128)$$

$$\geq \frac{2}{\prod_{i=1}^M \pi(2n_i + 1 - s)} \int d^{2M} \alpha \prod_{i=1}^M e^{-\frac{2}{2n_{\min} + 1 - s} |\alpha_i|^2} \prod_{j=1}^M \left( 1 - \frac{2}{s+1} e^{-\frac{2}{s+1} |\beta_j|^2} \right) \quad (129)$$

$$= \frac{2}{\prod_{i=1}^M \pi(2n_i + 1 - s)} \int d^{2M} \beta \prod_{j=1}^M \left( 1 - \frac{2}{s+1} e^{-\frac{2}{s+1} |\beta_j|^2} \right) e^{-\frac{2}{2n_{\min} + 1 - s} |\beta_j|^2} \quad (130)$$

$$= \prod_{i=1}^M \frac{(1 - \lambda_i) \lambda_{\min}^2}{\lambda_i (1 - \lambda_{\min})}, \quad (131)$$

where the inequality is valid when  $s \geq 1$ , and we take  $s = 1$  for the last equality. Thus for an  $M \times M$  HPSD matrix  $B$ , the Torontonian of  $\begin{pmatrix} B^T & 0 \\ 0 & B \end{pmatrix}$  is

$$\text{Tor} \begin{pmatrix} B^T & 0 \\ 0 & B \end{pmatrix} = p_{\text{on|th}} \mathcal{Z}' \geq \prod_{i=1}^M \frac{\lambda_{\min}^2}{\lambda_i (1 - \lambda_{\min})}. \quad (132)$$



Similarly, we also obtain an upper bound as

$$p_{\text{on|th}} = \int d^{2M} \alpha \prod_{i=1}^M \frac{2}{\pi(2n_i + 1 - s)} e^{-\frac{2}{2n_i + 1 - s} |\alpha_i|^2} \prod_{j=1}^M \left( 1 - \frac{2}{s + 1} e^{-\frac{2}{s + 1} |\beta_j|^2} \right) \quad (133)$$

$$\leq \frac{2}{\prod_{i=1}^M \pi(2n_i + 1 - s)} \int d^{2M} \alpha \prod_{i=1}^M e^{-\frac{2}{2n_{\max} + 1 - s} |\alpha_i|^2} \prod_{j=1}^M \left( 1 - \frac{2}{s + 1} e^{-\frac{2}{s + 1} |\beta_j|^2} \right) \quad (134)$$

$$= \frac{2}{\prod_{i=1}^M \pi(2n_i + 1 - s)} \int d^{2M} \beta \prod_{j=1}^M \left( 1 - \frac{2}{s + 1} e^{-\frac{2}{s + 1} |\beta_j|^2} \right) e^{-\frac{2}{2n_{\max} + 1 - s} |\beta_j|^2} \quad (135)$$

$$= \prod_{i=1}^M \frac{(1 - \lambda_i) \lambda_{\max}^2}{\lambda_i (1 - \lambda_{\max})}, \quad (136)$$

where we take  $s = 1$  for the last equality. Consequently,

$$\text{Tor} \begin{pmatrix} B^T & 0 \\ 0 & B \end{pmatrix} = p_{\text{on|th}} \mathcal{Z}' \leq \prod_{i=1}^M \frac{\lambda_{\max}^2}{\lambda_i (1 - \lambda_{\max})}. \quad (137)$$

Next, when the input state is a squeezed thermal state  $\{r_i, n\}_{i=1}^M$ . Then the probability of all “click” detection is

$$p_{\text{on|st}} = \int d^{2M} \alpha \prod_{i=1}^M \frac{2}{\pi \sqrt{(a_+(r_i, n) - s)(a_-(r_i, n) - s)}} e^{-\frac{2\alpha_{ix}^2}{a_+(r_i, n) - s} - \frac{2\alpha_{iy}^2}{a_-(r_i, n) - s}} \prod_{j=1}^M \left( 1 - \frac{2}{s + 1} e^{-\frac{2}{s + 1} |\beta_j|^2} \right) \quad (138)$$

$$\geq \frac{2}{\prod_{i=1}^M \pi \sqrt{(a_+(r_i, n) - s)(a_-(r_i, n) - s)}} \int d^{2M} \alpha \prod_{i=1}^M e^{-\frac{2|\alpha_i|^2}{a_{\min} - s}} \prod_{j=1}^M \left( 1 - \frac{2}{s + 1} e^{-\frac{2}{s + 1} |\beta_j|^2} \right) \quad (139)$$

$$= \frac{2}{\prod_{i=1}^M \pi \sqrt{(a_+(r_i, n) - s)(a_-(r_i, n) - s)}} \int d^{2M} \beta \prod_{j=1}^M \left( 1 - \frac{2}{s + 1} e^{-\frac{2}{s + 1} |\beta_j|^2} \right) e^{-\frac{2|\beta_j|^2}{a_{\min} - s}} \quad (140)$$

$$= \prod_{i=1}^M \frac{e^{-2r_{\max}} (1 - e^{2r_{\max}} + 2n)^2}{2(1 + e^{2r_{\max}} + 2n)} \frac{1}{\sqrt{\frac{1}{2} + n(n + 1) - (n + \frac{1}{2}) \cosh 2r_i}}, \quad (141)$$

where  $a_{i,\pm}(r_i, n) = (2n + 1)e^{\pm 2r_i}$ ,  $a_{\min} = (2n + 1)e^{-2r_{\max}}$ ,  $a_{\max} = (2n + 1)e^{2r_{\max}}$ , and we put  $s = 1$  for the last inequality. Assume  $a_{\min} \geq 1$ . Then for a matrix  $A' = \begin{pmatrix} B^T & R^* \\ R & B \end{pmatrix}$  satisfying Eqs. (25) and (26), a lower bound of the Torontonian is given by

$$\text{Tor}(A') = p_{\text{on|st}} \mathcal{Z}'' \geq \prod_{i=1}^M \frac{e^{-2r_{\max}} (1 - e^{2r_{\max}} + 2n)^2}{2(1 + e^{2r_{\max}} + 2n)} \frac{\sqrt{\frac{1}{2} + n(n + 1) + (n + \frac{1}{2}) \cosh 2r_i}}{\sqrt{\frac{1}{2} + n(n + 1) - (n + \frac{1}{2}) \cosh 2r_i}} := \prod_{i=1}^M L_i^T(r_i, n). \quad (142)$$

An upper bound can be obtained by a similar method, such as

$$p_{\text{on|st}} = \int d^{2M} \alpha \prod_{i=1}^M \frac{2}{\pi \sqrt{(a_+(r_i, n) - s)(a_-(r_i, n) - s)}} e^{-\frac{2\alpha_{ix}^2}{a_+(r_i, n) - s} - \frac{2\alpha_{iy}^2}{a_-(r_i, n) - s}} \prod_{j=1}^M \left( 1 - \frac{2}{s + 1} e^{-\frac{2}{s + 1} |\beta_j|^2} \right) \quad (143)$$

$$\leq \frac{2}{\prod_{i=1}^M \pi \sqrt{(a_+(r_i, n) - s)(a_-(r_i, n) - s)}} \int d^{2M} \alpha \prod_{i=1}^M e^{-\frac{2|\alpha_i|^2}{a_{\max} - s}} \prod_{j=1}^M \left( 1 - \frac{2}{s + 1} e^{-\frac{2}{s + 1} |\beta_j|^2} \right) \quad (144)$$

$$= \frac{2}{\prod_{i=1}^M \pi \sqrt{(a_+(r_i, n) - s)(a_-(r_i, n) - s)}} \int d^{2M} \beta \prod_{j=1}^M \left( 1 - \frac{2}{s + 1} e^{-\frac{2}{s + 1} |\beta_j|^2} \right) e^{-\frac{2|\beta_j|^2}{a_{\max} - s}} \quad (145)$$

$$= \prod_{i=1}^M \frac{e^{r_{\max}} (e^{r_{\max}} n + \sinh r_{\max})^2}{(1 + n) \cosh r_{\max} + n \sinh r_{\max}} \frac{1}{\sqrt{\frac{1}{2} + n(n + 1) - (n + \frac{1}{2}) \cosh 2r_i}}, \quad (146)$$



where we put  $s = 1$  for the last inequality. Consequently, an upper bound of the  $\text{Tor}(A')$  is obtained as

$$\text{Tor}(A') = p_{\text{on|st}} \mathcal{Z}'' \leq \prod_{i=1}^M \frac{e^{r_{\max}} (e^{r_{\max}} n + \sinh r_{\max})^2}{(1+n) \cosh r_{\max} + n \sinh r_{\max}} \frac{\sqrt{\frac{1}{2} + n(n+1) + (n + \frac{1}{2}) \cosh 2r_i}}{\sqrt{\frac{1}{2} + n(n+1) - (n + \frac{1}{2}) \cosh 2r_i}} := \prod_{i=1}^M G_i^T(r_i, n). \quad (147)$$

#### SUPPLEMENTARY NOTE 4 (SIMULABILITY OF GAUSSIAN BOSON SAMPLING)

Our approximation algorithm for outcome probabilities of a linear optical circuit have applications not only for the matrix functions, but also for Gaussian boson sampling, which is crucial for the demonstration of quantum supremacy [8]. From the results in Refs. [9], we have three level of a hierarchy of notions of classical simulation as following:

1. Poly-box : Inverse-polynomial additive-error approximation of any outcome probabilities including any marginals.
2.  $\epsilon$ -simulation : Approximate sampling simulation of probability distributions with  $\epsilon$ -error in total variation distance.
3. Multiplicative precision estimation : multiplicative-error approximation of any outcome probabilities including any marginals.

A poly-box can be promoted to  $\epsilon$ -simulation when the outcomes are poly-sparse, and multiplicative precision estimator implies  $\epsilon$ -simulation [9]. In our work, we can investigate this hierarchy in the GBS via a degree of classicality of the input state,  $s_{\max}$ . To do that, we consider a lossy GBS, in which the input state is product of lossy squeezed state having the covariance matrix on  $i$ th mode with  $V_i = \frac{1}{2} \begin{pmatrix} \eta e^{2r_i} + 1 - \eta & 0 \\ 0 & \eta e^{-2r_i} + 1 - \eta \end{pmatrix} := \frac{1}{2} \begin{pmatrix} a_{i+}(\eta, r_i) & 0 \\ 0 & a_{i-}(\eta, r_i) \end{pmatrix}$ . Note that  $-1 < s \leq s_{\max} \leq 1$  for a lossy squeezed state, and  $s_{\max} = a_{-}(\eta, r_{\max})$ . Thus  $s_{\max}$  goes to 0 as the maximum squeezing parameter  $r_{\max} \rightarrow \infty$ , which is consistent with the fact that a general Gaussian state can be well described by Wigner distribution. Then the outcome probability  $p_{\text{GBS}}(\mathbf{m})$  is given by

$$p_{\text{GBS}}(\mathbf{m}) = \pi^M \int d^{2M} \boldsymbol{\alpha} \prod_{i=1}^M W_{V_i}^{(s)}(\alpha_i) \prod_{j=1}^M W_{\Pi_{m_j}}^{(-s)}(\beta_j) \quad (148)$$

$$= \pi^M \int d^{2M} \boldsymbol{\alpha} \prod_{i=1}^M \frac{1}{\pi \sqrt{\det(V_i - s/2)}} e^{-\boldsymbol{\alpha}_i (V_i - s/2)^{-1} \boldsymbol{\alpha}_i^T} \prod_{j=1}^M \frac{2}{\pi(s+1)} \left( \frac{s-1}{s+1} \right)^{m_j} L_{m_j} \left( \frac{4|\beta_j|^2}{1-s^2} \right) e^{-\frac{2|\beta_j|^2}{s+1}} \quad (149)$$

$$= \pi^M \int d^{2M} \boldsymbol{\alpha} \prod_{i=1}^M \frac{2}{\pi \sqrt{(a_{i+}(\eta, r_i) - s)(a_{i-}(\eta, r_i) - s)}} e^{-\frac{2\alpha_{ix}^2}{a_{i+}(\eta, r_i) - s} - \frac{2\alpha_{iy}^2}{a_{i-}(\eta, r_i) - s}} \prod_{j=1}^M \frac{2}{\pi(s+1)} \left( \frac{s-1}{s+1} \right)^{m_j} L_{m_j} \left( \frac{4|\beta_j|^2}{1-s^2} \right) e^{-\frac{2|\beta_j|^2}{s+1}} \quad (150)$$

$$= \int d^{2M} \boldsymbol{\alpha} \prod_{i=1}^M \frac{2}{\pi} \sqrt{\frac{a_{+}(\eta, r_{\max}) - s - \gamma(a_{i+}(\eta, r_i) - s)}{(a_{i+}(\eta, r_i) - s)(a_{+}(\eta, r_{\max}) - s)}} \sqrt{\frac{a_{+}(\eta, r_{\max}) - s - \gamma(a_{i-}(\eta, r_i) - s)}{(a_{i-}(\eta, r_i) - s)(a_{+}(\eta, r_{\max}) - s)}} \quad (151)$$

$$\times e^{-\left(\frac{2}{a_{i+}(\eta, r_i) - s} - \gamma \frac{2}{a_{+}(\eta, r_{\max}) - s}\right) \alpha_{ix}^2 - \left(\frac{2}{a_{i-}(\eta, r_i) - s} - \gamma \frac{2}{a_{+}(\eta, r_{\max}) - s}\right) \alpha_{iy}^2} \quad (152)$$

$$\times \prod_{j=1}^M \sqrt{\frac{a_{+}(\eta, r_{\max}) - s}{a_{+}(\eta, r_{\max}) - s - \gamma(a_{i+}(\eta, r_i) - s)}} \sqrt{\frac{a_{+}(\eta, r_{\max}) - s}{a_{+}(\eta, r_{\max}) - s - \gamma(a_{i-}(\eta, r_i) - s)}} \quad (153)$$

$$\times \frac{2}{s+1} \left( \frac{s-1}{s+1} \right)^{m_j} L_{m_j} \left( \frac{4|\beta_j|^2}{1-s^2} \right) e^{-\left(\frac{2}{s+1} + \gamma \frac{2}{a_{+}(\eta, r_{\max}) - s}\right) |\beta_j|^2} \quad (154)$$

$$:= \int d^{2M} \boldsymbol{\alpha} \prod_{i=1}^M P_{\text{GBS},i}(\alpha_i, \eta, r_i, \gamma, s) \prod_{j=1}^M f_{\text{GBS},j}(\beta_j, \eta, r_j, m_j, \gamma, s), \quad (155)$$

where  $a_{\pm}(\eta, r_{\max}) = \eta e^{\pm 2r_{\max}} + 1 - \eta$ , and  $\gamma \in (0, 1]$  is a parameter modulating the Gaussian factor such as  $\gamma \rightarrow 1$  ( $\gamma = 0$ ) means maximum (no) shifting. The maximum shifting is limited by the maximum squeezing parameter



$r_{\max}$ . To check the poly-box condition, let us first consider the single-mode estimate for the single-photon outcome. Explicitly,

$$f_{\text{GBS},j}(\beta_j, \eta, r_j, 1, \gamma, s) = \sqrt{\frac{a_+(\eta, r_{\max}) - s}{a_+(\eta, r_{\max}) - s - \gamma(a_{j+}(\eta, r_j) - s)}} \sqrt{\frac{a_+(\eta, r_{\max}) - s}{a_+(\eta, r_{\max}) - s - \gamma(a_{j-}(\eta, r_j) - s)}} \\ \times \frac{8|\beta_j|^2 + 2(s^2 - 1)}{(s+1)^3} e^{-\left(\frac{2}{s+1} + \gamma \frac{2}{a_+(\eta, r_{\max}) - s}\right)|\beta_j|^2}. \quad (156)$$

We can efficiently estimate the probability if  $\max_{\beta_j} |f_{\text{GBS},j}| \leq 1$  for all  $j$ . An upper bound of the absolute value of the estimate is given by

$$\min_{s, \gamma} \max_{\beta_j} |f_{\text{GBS},j}(\beta_j, \eta, r_j, 1, \gamma, s)| \leq \max_{\beta_j} |f_{\text{GBS},j}(\beta_j, \eta, r_{\max}, 1, 0, s_{\max})|, \quad (157)$$

for given  $\eta, r_{\max}$ , and  $\gamma = 0, s = s_{\max}$  for the inequality. Then from the condition  $\max_{\beta_j} |f_j(\beta_j, \eta, r_{\max}, 1, 0, s_{\max})| \leq 1$ ,  $s_{\max}$  satisfies  $s_{\max} \geq \sqrt{5} - 2 \simeq 0.236$ . This corresponds to  $r_{\max} \leq \frac{1}{2} \log(2 + \sqrt{5}) \simeq 0.722$  for an ideal GBS ( $\eta = 1$ ). However, if we allow the photon loss, any squeezed input state is possible when  $\eta \leq 3 - \sqrt{5} \simeq 0.764$ , which is much higher transmissivity than those used in current experiments [10, 11]. Next, we need to check whether this condition is valid for any other outcomes. From the behavior of  $f_j(\beta, \eta, r, m, 0, s)$ , we can find out that

$$\max_{\beta} |f_j(\beta, \eta, r, m, 0, s)| \leq \max_{\beta} |f_j(\beta, \eta, r, 1, 0, s)|, \quad (158)$$

for  $m \geq 2$  and  $s \geq 0$ . Finally, we consider  $n = 0$  for zero-photon detection and  $f_j = 1$  for the marginalized probability owing to the normalization of measurement operators. In both cases, the integrals for  $\beta_j$ 's can be easily computed because  $f_j(\beta_j)$  and  $\beta_j$  components in  $P(\alpha)$  are just Gaussian distributions. Therefore, we can always perform the integrals including  $\beta_j$ 's corresponding to zero-photon or marginalized one, and estimate remaining terms. Furthermore, we examine the case of threshold detectors instead of number resolving measurements [7]. The corresponding  $f_{\text{on},j}$  for a 'click' event is written as

$$f_{\text{on},j}(\beta_j, \eta, r_j, \gamma, s) = \sqrt{\frac{a_+(\eta, r_{\max}) - s}{a_+(\eta, r_{\max}) - s - \gamma(a_{j+}(\eta, r_j) - s)}} \sqrt{\frac{a_+(\eta, r_{\max}) - s}{a_+(\eta, r_{\max}) - s - \gamma(a_{j-}(\eta, r_j) - s)}} \\ \times \left(1 - \frac{2}{s+1} e^{-\frac{2}{s+1}|\beta_j|^2}\right) e^{-\gamma \frac{2}{a_+(\eta, r_{\max}) - s}|\beta_j|^2}. \quad (159)$$

Then for  $\gamma = 0$  and  $s = 0$ , the range of  $f_{\text{on},j}(\beta_j, \eta, r_j, 0, 0) = 1 - 2e^{-2|\beta_j|^2}$  is on  $[-1, 1]$ , thus the poly-box condition is satisfied for all input squeezing and loss parameter.

Now we investigate whether an efficient estimation of GBS probability within multiplicative-error is possible. To do that, we consider Gaussian states which can have  $s_{\max} > 1$ , where the covariance matrix of  $i$ th mode state is given by

$$V_i = \frac{1}{2} \begin{pmatrix} \eta e^{2r_i} + (2n_{\text{th}} + 1)(1 - \eta) & 0 \\ 0 & \eta e^{-2r_i} + (2n_{\text{th}} + 1)(1 - \eta) \end{pmatrix} := \frac{1}{2} \begin{pmatrix} a_{i+}(\eta, n_{\text{th}}, r_i) & 0 \\ 0 & a_{i-}(\eta, n_{\text{th}}, r_i) \end{pmatrix}. \quad (160)$$

These are squeezed thermal states, in which pure squeezed states undergo a thermal noise with average photon number  $n_{\text{th}}$  instead of the vacuum loss. In this case  $-1 < s \leq a_-(\eta, n_{\text{th}}, r_{\max})$  for given  $\eta, n_{\text{th}}$ , and  $r_{\max}$ . Then we need to check the log-concavity of  $f_{\text{on},j}$  such that

$$f_{\text{on},j}(\beta_j, \eta, n_{\text{th}}, r_i, \gamma, s) \propto \left(1 - \frac{2}{s+1} e^{-\frac{2}{s+1}|\beta_j|^2}\right) e^{-\gamma \frac{2}{a_+(\eta, N, r_{\max}) - s}|\beta_j|^2}. \quad (161)$$

From Lemma 2, the condition for log-concavity of  $f_{\text{on},j}$  when  $\gamma \rightarrow 1$  is

$$\sqrt{4e^{r_{\max}} \eta \sinh r_{\max} + 4n_{\text{th}}(1 - \eta) + 5} \leq s \leq a_-(\eta, n_{\text{th}}, r_{\max}), \quad (162)$$

where  $a_-(\eta, n_{\text{th}}, r_{\max}) = \eta^{-2r_{\max}} + (2n_{\text{th}} + 1)(1 - \eta)$ . Thus for given  $r_{\max}$  and  $\eta$ , the average photon number of thermal noise  $N$  satisfies

$$n_{\text{th}} \geq \frac{e^{-r_{\max}} \eta \sinh r + \sqrt{1 + \eta \sinh 2r_{\max}}}{1 - \eta} > 1. \quad (163)$$

For instance, if  $\eta = 0.5$  and  $r_{\max} = 1$ , then  $n_{\text{th}} \geq n_{\text{th}}^* \simeq 3.79$  for the multiplicative-error estimation of the probability, and the minimum value of  $s_{\max}$  is 3 when  $\eta \rightarrow 0$ .



# SUPPLEMENTARY REFERENCES

- [1] Barvinok, A. *Combinatorics and complexity of partition functions*, vol. 9 (Springer, 2016).
- [2] Meiburg, A. Inapproximability of positive semidefinite permanents and quantum state tomography. In *63rd Symp. Found. Comput. Sci. (FOCS)*, 58–68 (IEEE, 2022).
- [3] Barvinok, A. A remark on approximating permanents of positive definite matrices. *Linear Algebra Appl.* **608**, 399–406 (2021).
- [4] Chakhmakhchyan, L., Cerf, N. J. & Garcia-Patron, R. Quantum-inspired algorithm for estimating the permanent of positive semidefinite matrices. *Phys. Rev. A* **96**, 022329 (2017).
- [5] Bunse-Gerstner, A. & Gragg, W. B. Singular value decompositions of complex symmetric matrices. *J. Comput. Appl. Math.* **21**, 41–54 (1988).
- [6] Hoeffding, W. *Probability Inequalities for sums of Bounded Random Variables*, 409–426 (Springer New York, New York, NY, 1994).
- [7] Quesada, N., Arrazola, J. M. & Killoran, N. Gaussian boson sampling using threshold detectors. *Phys. Rev. A* **98**, 062322 (2018).
- [8] Hamilton, C. S. *et al.* Gaussian boson sampling. *Phys. Rev. Lett.* **119**, 170501 (2017).
- [9] Pashayan, H., Bartlett, S. D. & Gross, D. From estimation of quantum probabilities to simulation of quantum circuits. *Quantum* **4**, 223 (2020).
- [10] Zhong, H.-S. *et al.* Phase-programmable Gaussian boson sampling using stimulated squeezed light. *Phys. Rev. Lett.* **127**, 180502 (2021).
- [11] Madsen, L. S. *et al.* Quantum computational advantage with a programmable photonic processor. *Nature* **606**, 75–81 (2022).
